# Structure-function analysis of the nsp14 N7-guanine methyltransferase reveals an essential role in betacoronavirus replication

Natacha S. Ogando<sup>1#</sup>, Priscila El Kazzi<sup>2#</sup>, Clara C. Posthuma<sup>1</sup>, Volker Thiel<sup>3,4</sup>, Bruno Canard<sup>2</sup>, François Ferron<sup>2,3#</sup>, Etienne Decroly<sup>2£#</sup> & Eric J. Snijder<sup>1\*#</sup>

<sup>1</sup> Department of Medical Microbiology, Leiden University Medical Center, Leiden, The Netherlands, 2333ZA

<sup>2</sup> Architecture et Fonction des Macromolécules Biologiques, Centre National de la Recherche Scientifique, Aix-Marseille Université, Marseille, France, 13288

<sup>3</sup> European Virus Bioinformatics Center, Jena, Germany, 07743.

<sup>4</sup> Institute of Virology and Immunology (IVI), Bern, Switzerland, 3350.

<sup>5</sup> Department of Infectious Diseases and Pathobiology, Vetsuisse Faculty, University of Bern, Bern, Switzerland, 3012.

#authors contributed equally

\* Eric J. Snijder; Email: [E.J.Snijder@lumc.nl](mailto:E.J.Snijder@lumc.nl)

£ Etienne Decroly; Email: [Etienne.decroly@univ-amu.fr](mailto:Etienne.decroly@univ-amu.fr)

**Author Contributions:** N.O., P.E.K., and F.F. performed experimental work. N.O., P.E.K., F.F., B.C., E.D. and E.J.S. analyzed the data and formulated research hypothesis. C.C.P., V.T., B.C., E.D., and E.J.S. supervised research and contributed in scientific discussions. N.O., P.E.K., F.F. E. D. and E.J.S. wrote the paper. All authors approved the version submitted.

**Competing Interest Statement:** All authors declare no competing interests.

**Classification:** Biological Sciences, Microbiology

**Keywords** (3 to 5 words): SARS-CoV-2, MERS-CoV, SARS-CoV, RNA synthesis, capping

**PDF file includes:** Main Text; Figures 1 to 5; Supplementary Figure 2; Supplementary Table 1

## **Abstract (250 words; may include up to three cited (non-numerical) references)**

As coronaviruses (CoVs) replicate in the host cell cytoplasm, they rely on their own capping machinery to ensure the efficient translation of their mRNAs, protect them from degradation by cellular 5' exoribonucleases, and escape innate immune sensing. The CoV nonstructural protein 14 (nsp14) is a bi-functional replicase subunit harboring an N-terminal 3'-to-5' exoribonuclease (ExoN) domain and a C-terminal (N7-guanine)-methyltransferase (N7-MTase) domain that is assumed to be involved in viral mRNA capping. Here, we first revisited the crystal structure of severe acute respiratory syndrome (SARS)-CoV nsp14 to perform an *in silico* comparative analysis between different betacoronaviruses ( $\beta$ -CoVs). In this study, we identified several residues likely to be involved in the formation of the catalytic pocket of N7MTase, which presents a fold that is distinct from the Rossmann fold observed in most known MTases. Next, for multiple  $\beta$ -CoVs, site-directed mutagenesis of selected residues was used to assess their importance for *in vitro* enzymatic activity and viral replication in cell culture. For SARS-CoV and Middle East respiratory syndrome-CoV, most of the engineered mutations abolished the N7-MTase function, while not affecting nsp14-ExoN activity. Upon reverse engineering of these mutations into  $\beta$ -CoV genomes, we identified two substitutions (R310A and F426A in SARS-CoV) that abrogated viral progeny production and one mutation (H424A) that yielded a crippled phenotype across all  $\beta$ -CoVs tested. Our results identify the N7-MTase as a critical enzyme for  $\beta$ -CoV replication and defined key residues of its catalytic pocket that can be targeted to design inhibitors with a potential *pan*-coronaviral activity spectrum.

## **Significance Statement (50 to 120 words)**

The ongoing SARS-CoV-2 pandemic emphasizes the urgent need to develop efficient broad-spectrum anti-CoV drugs. The structure-function characterization of conserved CoV replicative enzymes is key to identifying the most suitable drug targets. Using a multidisciplinary comparative approach and different  $\beta$ -CoVs, we characterized the key conserved residues of nsp14 (N7-guanine)-methyltransferase, a poorly defined subunit of the CoV mRNA-synthesizing machinery. Our study highlights the unique structural features of this enzyme and establishes its essential role in  $\beta$ -CoV replication, while identifying two residues that are critical for the replication of all four  $\beta$ -CoVs tested, including SARS-CoV-2.

## Introduction

At their 5' end, all eukaryotic mRNAs carry an N7-methylguanosine cap that ensures their translation by mediating mRNA recognition during the formation of the ribosomal pre-initiation complex. The co-transcriptional capping of cellular pre-mRNAs occurs in the nucleus and is also critical for pre-mRNA splicing and nuclear export (reviewed in (Ghosh and Lima 2010, Ferron, Decroly et al. 2012, Ramanathan, Robb et al. 2016)). The mRNA cap consists of an N7-methylated 5' guanosine moiety that is linked to the first nucleotide of the transcript by a 5'-5' triphosphate bridge (Shatkin 1976). Its synthesis requires (presumably) the consecutive involvement of triphosphatase, guanylyltransferase, and guanine-N7 methyltransferase activities to produce a cap-0 structure. The first 2 nucleotides of mammalian mRNAs are then methylated on the 2'OH position to yield a cap-1 structure that identifies the transcript as “self” and prevents activation of innate immune sensors (reviewed in (Kindler and Thiel 2014, Ramanathan, Robb et al. 2016)). Furthermore, the cap structure promotes mRNA stability by providing protection from cellular 5' exoribonucleases.

Viruses rely on host ribosomes for their gene expression and have adopted different strategies to ensure translation of their own mRNAs. These include using the canonical nuclear capping pathway, so-called ‘cap-snatching’ mechanisms, and replacement of the cap by a ribosome-recruiting RNA structure (reviewed in (Koonin and Moss 2010, Decroly, Ferron et al. 2011, Ramanathan, Robb et al. 2016)). Various cytosolically replicating virus families have evolved their own capping machinery. The latter applies to the coronavirus (CoV) family, which includes the severe acute respiratory syndrome coronavirus 2 (SARS-CoV-2), the causative agent of COVID-19 (Gorbalenya, Baker et al. 2020, Zhou, Yang et al. 2020), and a range of other CoVs infecting human or animal hosts (van der Hoek 2007, Wang, Grunewald et al. 2020). This century alone, the CoV family has given rise to three major zoonotic introductions: SARS-CoV-2, the Middle East respiratory syndrome-CoV (MERS-CoV) discovered in 2012, and SARS-CoV, emerging in South East Asia in 2002. All three belong to the genus betacoronavirus ( $\beta$ -CoV), which is abundantly represented among CoVs circulating in bat species (Ge, Li et al. 2013, Menachery, Yount et al. 2015, Hu, Zeng et al. 2017, Cui, Li et al. 2019). Despite their demonstrated potential to cross species barriers, prophylactic and therapeutic solutions for CoV infections to prevent or rapidly contain the current COVID-19 pandemic were not available.

The positive-sense CoV genome is unusually large (~30 kb) and its 5' proximal two-thirds encodes for two replicase polyproteins that are post-translationally cleaved into 16 nonstructural

proteins (nsp) (Snijder, Bredenbeek et al. 2003, Snijder, Decroly et al. 2016). The CoV replicative enzymes, including the nsp12 RNA-dependent RNA polymerase (RdRp), assemble into a protein complex that is embedded within virus-induced replication organelles (Knoops, Kikkert et al. 2008, Klein, Cortese et al. 2020, Snijder, Limpens et al. 2020) and directs the synthesis and capping of newly made viral genomes as well as subgenomic mRNAs that serve to express additional CoV genes. Capping is thought to involve the successive action of multiple CoV enzymes: (i) the nsp13 RNA triphosphatase removing the  $\gamma$  phosphate from the nascent 5'-triphosphorylated RNA (Seybert, Hegyi et al. 2000, Ivanov and Ziebuhr 2004); (ii) an RNA guanylyltransferase (GTase) producing a GpppN cap by transferring guanosine monophosphate (GMP) to the RNA's dephosphorylated 5' end, a role recently attributed to the nsp12 nucleotidyltransferase (NiRAN) domain, but remaining to be confirmed (Lehmann, Gulyaeva et al. 2015, Yan, Ge et al. 2020, Shannon, Fattorini et al. 2021); (iii) the nsp14 (N7-guanine)-methyltransferase (N7-MTase) methylating the N7 position of the cap while using S-adenosyl methionine (SAM) as methyl donor; (iv) the nsp16 ribose 2'-O-methyltransferase (2'-O-MTase) converting the cap-0 into a cap-1 structure ( $^7mGpppN_{2'O_m}$ ; (Chen, Cai et al. 2009, Bouvet, Debarnot et al. 2010)) by performing additional methylation with the assistance of nsp10 as co-factor (Decroly, Imbert et al. 2008, Bouvet, Debarnot et al. 2010, Chen, Su et al. 2011).

Over the past 15 years, the CoV capping machinery has mainly been analyzed *in vitro*, in particular for SARS-CoV, but its characterization in the context of the viral replication cycle has been lagging behind. This applies in particular to the CoV N7-MTase domain, expressed as part of the ~60-kDa nsp14, a bi-functional replicase subunit also containing an N-terminal 3'-to-5' exoribonuclease domain implicated in promoting the fidelity of CoV replication (Denison, Graham et al. 2011, Ogando, Ferron et al. 2019). Following the discovery of an N7-MTase activity associated with nsp14's C-terminal domain (Chen, Cai et al. 2009), the protein was found to methylate non-methylated cap analogues or guanosine triphosphate (GTP) substrates in the presence of SAM in biochemical assays (Bouvet, Debarnot et al. 2010, Chen, Tao et al. 2013, Jin, Chen et al. 2013). While the association of nsp10 with nsp14 enhances its ExoN activity, the *in vitro* N7-MTase activity does not depend on any co-factor (Bouvet, Debarnot et al. 2010, Bouvet, Imbert et al. 2012). Biochemical and structural characterization of the N7-MTase and ExoN domains demonstrated that the two domains are functionally distinct (Ma, Wu et al. 2015, Ferron, Subissi et al. 2018, Ogando, Zevenhoven-Dobbe et al. 2020, Saramago, Bárria et al. 2021). Nevertheless, truncations and alanine substitutions in the ExoN domain can severely

affect SAM binding and N7-MTase activity (Chen, Cai et al. 2009, Chen, Tao et al. 2013). The notion that the two enzymatic domains are structurally intertwined was also supported by the SARS-CoV nsp14 crystal structure (Ma, Wu et al. 2015, Ferron, Subissi et al. 2018) which was found to be composed of (i) a flexible N-terminal sub-domain forming the nsp10 binding site (aa 1-58), (ii) the 3'-to-5' exoribonuclease (ExoN) domain (aa 1-291), (iii) a flexible hinge region consisting of a loop that connects the N- and C-terminal domains, and three strands protruding from the C-terminal domain (aa 285-300 and aa 407-430), and (iv) the C-terminal N7-MTase domain (aa 292-527) ((Ma, Wu et al. 2015, Ferron, Subissi et al. 2018); Fig 1A).

Interestingly, the structural analysis of the SARS-CoV-nsp14 N7-MTase revealed a non-Rossmann fold (Ferron, Subissi et al. 2018), distinguishing this enzyme from commonly known cellular and viral methyltransferases (Xie and Bourne 2008, Gana, Rao et al. 2013). Despite the biochemical characterization of the CoV N7-MTase, the assessment of its importance for virus replication has remained limited to studies with a few point mutations introduced into nsp14 of murine hepatitis virus, a model  $\beta$ -CoV (Sperry, Kazi et al. 2005, Eckerle, Lu et al. 2007, Case, Ashbrook et al. 2016). These studies highlighted two motifs important for CoV replication: (i) the presumed SAM binding motif I (DxGxPxG/A, with x being any amino acid; Fig. 2C, motif III), first discovered by superimposition of a SARS-CoV nsp14 N7-MTase structure model with the crystal structures of cellular N7-MTases (Chen, Cai et al. 2009); (ii) nsp14 residues 420-428 that, based on the crystal structure, seem to form a constricted pocket holding the cap's GTP moiety (Ma, Wu et al. 2015). Comparative analysis of N7-MTase domains revealed that a number of residues crucial for substrate and ligand binding are conserved among homologous enzymes in more distant CoV relatives (Ferron, Debat et al. 2020).

Due to its conservation and unique structural features, the CoV N7-MTase constitutes an attractive target for antiviral drug development (Sun, Wang et al. 2014, Aouadi, Eydoux et al. 2017, Ahmed-Belkacem, Sutto-Ortiz et al. 2020), to combat SARS-CoV-2 or future emerging CoV threats. Only a few compounds have been reported to inhibit nsp14 N7-MTase activity *in vitro* (Bouvet, Debarnot et al. 2010, Jin, Chen et al. 2013, Sun, Wang et al. 2014, Aouadi, Eydoux et al. 2017, Ahmed-Belkacem, Sutto-Ortiz et al. 2020). Evaluation of their antiviral activity revealed limited inhibition of CoV replication in cell culture, suggesting poor bio-availability and/or specificity (He, Adonov et al. 2004, Sun, Wang et al. 2014). Structural, biochemical, and virological studies of CoV N7-MTase structure and function have not been integrated thus far. Here, we set out to define the catalytic pocket, characterize its involvement

in enzymatic activity, and use these observations to probe the enzyme's importance for CoV replication. Using four different  $\beta$ -CoVs (SARS-CoV, MERS-CoV, MHV, and SARS-CoV-2), we identified conserved features and residues supporting N7-MTase activity and viral replication, thus providing a solid framework for future efforts to design broad-spectrum inhibitors of this critical CoV enzyme.

## Results

**Identification of key residues for RNA and SAM binding by the CoV N7-MTase.** The previously resolved SARS-CoV nsp14 structure (Ma, Wu et al. 2015, Ferron, Subissi et al. 2018) revealed how the ExoN and N7-MTase domains are structurally interconnected, with possible functional implications (Fig. 1). Thus far, a structure of nsp14 in complex with 5'-capped RNA is lacking. Due to some structural peculiarities, it was unclear which conserved residues may be mechanistically involved in N7-methylation and how important these may be for overall CoV replication. Therefore, we first revisited the core structure of the CoV N7-MTase, to guide a subsequent biochemical and virological comparison across multiple  $\beta$ -CoVs.

In the SARS-CoV nsp14 structure (Ma, Wu et al. 2015), the ExoN core presents a fold characteristic of the DED/EDh family of exonucleases (Barnes, Spacciapoli et al. 1995, Zuo and Deutscher 2001, Ogando, Ferron et al. 2019). However, the N7-MTase domain does not exhibit the canonical 'Rossmann fold' that is common among RNA virus MTases, RNA cap-0 MTases at large (Ferron, Subissi et al. 2018), and all five classes of SAM-dependent MTases (Byszewska, Smietanski et al. 2014, Chouhan, Maimaiti et al. 2019). A hinge region that is highly conserved across CoVs is present at the interface of nsp14's ExoN and N7-MTase domains (Fig. 2) and constitutes a unique structural feature of this bi-functional CoV protein. It not only connects the two domains, but also forms an extension that protrudes from the surface of the N7-MTase domain (Fig. 1B). Although, the overall structure suggests ExoN and N7-MTase to be separate domains, attempts to express and purify truncated forms of these domains, with or without the hinge sub-domain, yielded insoluble recombinant proteins (data not shown). This might be related to the hydrophobic nature of the hinge, which is likely important for protein stability and folding. Several studies reported that the replacement of ExoN catalytic residues does not impair the N7-MTase activity, suggesting that the functional interplay between the two domains is limited (Chen, Cai et al. 2009, Bouvet, Debarnot et al. 2010, Chen, Tao et al. 2013, Sun, Wang et al. 2014, Ogando, Zevenhoven-Dobbe et al. 2020, Saramago, Barria et al. 2021). Whereas the hinge region allows lateral and rotational movement of the two nsp14 domains, one side of the hinge also constitutes the 'ceiling' of the N7-MTase active site (Fig. 1B).

The structure of nsp14 in complex with SAM and GpppA (PDB: 5C8S and 5C8T; (Ma, Wu et al. 2015)) have defined the enzyme's cap-binding pocket. However, the crystal packing profoundly constrained the structural characterization of the N7-MTase domain and the overall low



resolution left uncertainties regarding the positioning of the RNA ligand. Therefore, we performed a thorough structural analysis of the enzyme's cavity, supported by CoV-wide nsp14 sequence comparisons, in order to define conserved N7-MTase residues that may be involved in enzymatic activity. Several aspects were taken into consideration while delimiting the SAM and RNA binding sites: the general geometry of the cavity, its electrostatic properties, and the conservation of specific amino acid residues. We used Surfnets software (Laskowski 1995) to define the volume corresponding to the ligand-binding cavity (Fig. 1C). This volume is shaped as a dual bulb, with the larger pocket accommodating the capped RNA and the smaller one forming the SAM binding site. An electrostatic surface analysis shows positive charges lining the wall of the putative RNA-binding cavity (Fig. S1), which would be consistent with its function. Likewise, positive charges that might accommodate the carbocyclic part of the methyl donor were identified in the SAM binding pocket (Fig. 1D). Additionally, conserved hydrophobic residues (Motif I; Fig. 3B) were mapped to a deep hydrophobic cavity, supposedly accommodating the SAM base by a stacking interaction with F426. Finally, the integration of the structural models with CoV-wide N7-MTase sequence comparisons (Table S1) allowed the identification of conserved potential key residues within each cavity (blue regions in Fig. 2). Based on their conservation and positioning, six conserved motifs (I-VI) were identified, containing a series of specific charged or aromatic residues that have their side chain pointing toward the cavity (Fig. 3A and 3B). Their features suggested they can facilitate the methyl transfer from SAM onto the cap's guanine residue at the 5' end of RNA substrate, by stabilizing and/or correctly positioning the cap structure. The following potential key residues were identified (amino acid numbers matching those in SARS-CoV nsp14): Motif I, W292; Motif II, N306 and R310; Motif III, D331 and K336; Motif IV, D353; Motif V, N386; Motif VI, Y420, N422, H424, and F426 (Fig. 3A and 3B). To assess the possible impact of their replacement on nsp14 folding, we analyzed the predicted impact of single-site substitutions with alanine on the thermostability of nsp14 (Fig. 3C). Except for R310, all replacements yielded positive  $\Delta\Delta G$  values, suggesting that these mutations may affect MTase stability (Fig. 3C). Noticeably, mutations in Motifs I and VI, which are spatially close as part of the hinge and most likely involved in the binding of capped-RNA, resulted in the largest  $\Delta\Delta G$  gains. Similar observations were made when the impact of substitutions with other amino acids was evaluated for different  $\beta$ -CoVs (Table S2).

**Identification of residues crucial for *in vitro* N7-MTase activity.** To experimentally verify the outcome of our structural analysis (Fig. 1 to 3), we probed the functional importance of selected



residues through targeted mutagenesis and *in vitro* N7-MTase assays. Based on their conservation, charge, position, and potential role for RNA or SAM binding in the catalytic pocket (Fig. 3A and 3B), nine and seven residues in recombinant SARS-CoV and MERS-CoV nsp14, respectively, were replaced with alanine. N-terminally His-tagged proteins were expressed in *E. coli* and purified using immobilized metal affinity chromatography (IMAC) followed by size exclusion chromatography (Fig. 4A and 4B).

We evaluated the N7-MTase activity of nsp14 mutants in an assay using a GpppACCCC capped RNA substrate and radiolabeled [<sup>3</sup>H]SAM. The transfer of the [<sup>3</sup>H]methyl group onto the RNA substrate was quantified using filter binding assays (Fig. 4C and 4D), as described previously (Bouvet, Debarnot et al. 2010, Bouvet, Imbert et al. 2012), and compared to the enzymatic activity of wild-type SARS-CoV or MERS-CoV nsp14. With the exception of N306A (30% residual activity) and H424A (40% remaining), all SARS-CoV mutations tested completely abrogated nsp14 N7-MTase activity (Fig. 4C). In the case of MERS-CoV nsp14, only mutant F422A retained partial N7-MTase activity (70%), while again all other mutations rendered the enzymatic activity undetectable (Fig. 4D). In terms of residual activity, differences were observed for some pairs of equivalent SARS-CoV and MERS-CoV mutants (e.g. the H and F in motif VI), but overall the results were fully in line with the outcome of our structural analysis. Thus, our data confirmed and extended a previous study (Ma, Wu et al. 2015) and showed that N7-MTase activity is affected by mutations that either inhibit SAM binding (W292A, D331A, G333A, K336A in SARS-CoV) or likely interfere with RNA chain stabilization (N306A, R310A, Y420A, F426A).

**Revisiting the interplay between the N7-MTase and ExoN domains of nsp14.** Despite the notion that the ExoN and N7-MTase domains of CoV nsp14 may be functionally independent (Chen, Cai et al. 2009, Chen, Tao et al. 2013, Ma, Wu et al. 2015, Ferron, Subissi et al. 2018), they are structurally interconnected by the hinge region (Fig. 1). Therefore, we evaluated the impact of all of our N7-MTase mutations on ExoN functionality, using an *in vitro* assay with 5'-radiolabeled RNA substrate H4 (Bouvet, Imbert et al. 2012), a 22-nt RNA of which the largest part folds into a hairpin structure. Its degradation was monitored using denaturing polyacrylamide gel electrophoresis and autoradiography (Fig. 5). Nsp10 was added as a co-factor that importantly stimulates nsp14 ExoN activity (Bouvet, Imbert et al. 2012, Ma, Wu et al. 2015, Ogando, Zevenhoven-Dobbe et al. 2020), as again confirmed in the 'nsp14 only' control

assay (Fig. 5). As expected, in time course experiments, we observed the progressive 3'-to-5' degradation of the RNA substrate by the wild-type nsp10-nsp14 pair of both SARS-CoV (Fig. 5A) and MERS-CoV (Fig. 5B). In the same assay, most of our N7-MTase mutations barely affected ExoN activity (Fig. 5A and 5B), also supporting the notion that these mutant proteins had folded correctly. In contrast, the ExoN activity of SARS-CoV mutants Y420A, H424A, and F426A, and MERS-CoV mutants G333A and H420A was strongly reduced or abolished. In particular the negative impact of the MERS-CoV G333A mutation on ExoN activity was unexpected, as this mutation maps to the SAM binding domain of the N7-MTase (Motif III). Possibly this mutation destabilizes the recombinant protein. The remaining four mutations that affected ExoN activity all mapped to motif VI in the hinge region (Fig. 3A and 3B). Based on the structural analysis, we assume that these mutations affect either the overall nsp14 folding or – more likely - constrain the flexibility of the hinge subdomain with negative consequences for ExoN functionality (Ma, Wu et al. 2015, Ferron, Subissi et al. 2018). Conversely, a MERS-CoV ExoN knockout mutant (D90A/E92A), which was included as a control, was found to modestly impact N7-MTase activity (Fig. 4D). Taken together, our data suggest that, although the N7-MTase sequence is well conserved among  $\beta$ -CoVs (Ma, Wu et al. 2015, Ogando, Zevenhoven-Dobbe et al. 2020), the differences observed between SARS-CoV and MERS-CoV must be caused by a certain level of structural variability.

**The nsp14 N7-MTase is critical for SARS-CoV viability.** As summarized above, most prior biochemical and structural studies of the CoV N7-MTase were performed using SARS-CoV nsp14, whereas mutagenesis in the context of virus replication (using reverse genetics) was restricted to MHV studies in which, for different reasons, the conserved D and G residues in motif III and the Y residue in motif VI were targeted (Sperry, Kazi et al. 2005, Eckerle, Brockway et al. 2006, Case, Ashbrook et al. 2016). To establish a connection between the biochemical and virological data on the N7-MTase, we first transferred ten single N7-MTase mutations to the SARS-CoV genome, using a bacterial artificial chromosome-based reverse genetics system. Each mutant was engineered in duplicate and launched by *in vitro* transcribing full-length RNA that was electroporated into BHK-21 cells. To propagate viral progeny, if released, transfected BHK-21 cells were mixed with Vero E6 cells and incubated up to 6 days. Each mutant was launched at least four times, using RNA from 2 independent clones in two independent experiments, and mutant phenotypes are summarized in Fig. 6A.

In line with the biochemical data, the non-viable phenotype of 6 of the mutants (Fig. 6B) provided clear support for the importance of key residues in N7-MTase motifs II (R310), III (D331 and G333), V (N386), and VI (Y420 and F426). As anticipated, mutations in the canonical SAM binding motif III (DxGxPxG/A) completely abrogated SARS-CoV replication (Fig. 6A), apparently confirming the critical role of D331, which was postulated to be a key residue for methylation upon the discovery of the CoV N7-MTase (Chen, Cai et al. 2009). On the other hand, D331A was the only non-viable SARS-CoV mutant for which reversion to wild-type was occasionally observed, suggesting that a very low level of viral RNA synthesis remained possible in spite of this mutation (see also below). Remarkably, mutations N306A and K336A in motifs II and III, respectively, were found to yield viruses with plaque phenotypes and progeny titers similar to those of the wt control (Fig. 6), despite the major impact of these mutations on *in vitro* N7-MTase activity (Fig. 4A). Likewise, the viable but severely crippled (small-plaque) virus phenotypes of motif-I mutant W292A and motif VI-mutant H424A were surprising (Fig. 6B), although for the latter the biochemical assays did reveal some activity when performed with an increased enzyme concentration (Fig. 4C and (Ma, Wu et al. 2015)). For all four mutants, the presence of the original mutation in the viral progeny was confirmed by sequence analysis of the nsp14-coding region of the genome. For non-viable mutants, transfected cells were incubated and monitored for 6 days and absence of viral activity was also confirmed by immunofluorescence microscopy with antibodies specific for double-stranded RNA and SARS-CoV nsp4 (data not shown).

In general, our data demonstrated the importance of the N7-MTase domain for SARS-CoV viability and confirmed the importance of most of the motifs/key residues identified using structural biology and biochemical approaches. Nevertheless, for several mutants the data from different types of assays were not readily aligned, which prompted us to expand the reverse genetics efforts to other  $\beta$ -CoVs.

**Phenotypic differences between  $\beta$ -CoV N7-MTase mutants suggest complex structure-function relationships.** Even when targeting highly conserved viral functions, the introduction of equivalent mutations in closely related viruses can sometimes yield remarkably different mutant phenotypes. A recent example is the inactivation of the nsp14 ExoN, which is tolerated by MHV and SARS-CoV, but not by MERS-CoV and SARS-CoV-2, the latter virus having an nsp14 sequence that is 95% identical to that of SARS-CoV (Ogando, Zevenhoven-Dobbe et al.

2020). To expand our understanding of the impact of N7-MTase mutagenesis, we engineered, launched, and analyzed a set of MERS-CoV and MHV mutants, using technical procedures similar to those described above for SARS-CoV (see Methods). In this case, the production of viable progeny was facilitated by co-culturing transfected BHK-21 cells with host cells appropriate for the amplification of MHV (17clone1 cells) or MERS-CoV (Huh7 cells). Again, each mutant was launched at least four times (from duplicate clones) and results are summarized in Fig. 6.

The mutations tested for MERS-CoV and MHV had a large predicted impact in our folding free energy analysis (Fig. 3C) and/or yielded a non-viable or crippled phenotype in our SARS-CoV study (Fig. 6A). We evaluated whether these residues were equally critical for the replication of other  $\beta$ -CoVs. For clarity, in the text below we will refer to these mutants using SARS-CoV nsp14 amino acid numbering, but the correct (slightly different) MERS-CoV and MHV nsp14 amino acid numbers are used in Fig. 4, 5 and 6B.

In contrast to the SARS-CoV result, mutant W292A (motif I, SAM binding site) was not viable for both MERS-CoV and MHV. Strikingly, mutagenesis of D331 and G333 in motif III (SAM binding site) yielded the opposite outcome: both were not tolerated in SARS-CoV, but resulted in crippled or even wild type-like phenotypes for MERS-CoV and MHV, respectively (Fig. 6B). These results again suggested that CoV N7-MTase active site mutants can be (partially) viable, even in the absence of detectable enzymatic activity *in vitro* (Fig. 4D). Replacement of H424 in motif VI (RNA binding site) consistently crippled replication across SARS-CoV, MERS-CoV, and MHV (Fig. 6B), while replacement of Y420A in the same motif was partially tolerated by MERS-CoV, but not by SARS-CoV and MHV.

Our  $\beta$ -CoV comparison identified only two N7-MTase mutations that consistently abrogated the replication of all three viruses tested: R310A (motif II) and F426A (Motif VI), both mapping to the putative RNA binding site. This was surprising in the case of MERS-CoV, given the fact that this mutation (F422A in MERS-CoV) allowed substantial N7-MTase activity in the *in vitro* assay (Fig. 4D). When SARS-CoV-2 emerged during the course of this study, the R310A and F426A mutants were also engineered for this newly discovered virus and again found to fully abrogate virus replication (Fig. 6A).

## Discussion

Most viral MTases belong to the Rossmann-fold family (Medvedev, Kinch et al. 2018, Chouhan, Maimaiti et al. 2019), a ubiquitous higher-order structure among dinucleotide-binding enzymes (Rao and Rossmann 1973, Chouhan, Maimaiti et al. 2019). The CoV nsp14 N7-MTase was the first identified example of a non-Rossmann fold viral MTase (Ma, Wu et al. 2015, Ferron, Subissi et al. 2018, Ferron, Debat et al. 2020), and the only one thus far for which some structural and functional information had been gathered. While some viral N7-MTase crystal structures have been resolved (Egloff, Benarroch et al. 2002, Tao, Farsetta et al. 2002, Sutton, Grimes et al. 2007, Ma, Wu et al. 2015, Ferron, Subissi et al. 2018), their biochemical properties and signature sequences critical for RNA binding or enzymatic activity remain poorly defined compared to e.g. the 2'-O-MTases, an example of which is found in CoV nsp16 (reviewed in (Decroly, Ferron et al. 2011)).

Likewise, the biological role and relevance of the CoV N7-MTase have not been explored in much detail. In recent studies and reviews, often related to SARS-CoV-2, the enzyme is widely assumed to secure the translation of CoV subgenomic mRNAs and genome, which obviously is a critical step for any positive-stranded RNA virus. However, direct biochemical evidence showing that CoV mRNAs indeed carry an N7-methylated cap at their 5' end is still lacking. The presence of such a cap on CoV RNAs was first postulated following RNase T1 and T2 digestion studies with <sup>32</sup>P-labeled MHV RNA, 40 years ago (Lai and Stohlman 1981). Additional support came from immunoprecipitation experiments using a cap-specific monoclonal antibody (recognizing both the rare nucleoside 2,2,7-trimethylguanosine and 7-methylguanosine (m7G) cap structures ) that brought down the mRNAs of equine torovirus (van Vliet, Smits et al. 2002), a distant CoV relative for which – perhaps strikingly – an N7-MTase domain still remains to be identified (Ferron, Debat et al. 2020). The presence of enzymes required for capping in CoVs and many of their relatives (Seybert, Posthuma et al. 2005, Decroly, Ferron et al. 2011, Snijder, Decroly et al. 2016, Saberi, Gulyaeva et al. 2018, Ferron, Debat et al. 2020) and the *in vitro* activity profile of recombinant CoV nsp14 (Chen, Cai et al. 2009, Bouvet, Debarnot et al. 2010, Chen, Tao et al. 2013, Jin, Chen et al. 2013, Ogando, Zevenhoven-Dobbe et al. 2020, Saramago, Bárria et al. 2021) lend additional credibility to CoV capping and cap methylation, but do not exclude the possibility that the CoV N7-MTase may target other substrates as well.

To enhance our overall understanding of nsp14 N7-MTase structure and function, also in the light of its emergence as an important drug target in the battle against SARS-CoV-2 (Ahmed-Belkacem, Sutto-Ortiz et al. 2020, Basu, Mak et al. 2021, Devkota, Schapira et al. 2021,

Pearson, Green et al. 2021), we now revisited the SARS-CoV nsp14 X-ray structure to define the most likely residues involved in N7-MTase substrate binding and catalysis. Instead of a  $\beta\alpha\beta$  architecture (a seven-stranded  $\beta$ -sheet surrounded by 6  $\alpha$ -helices) and the canonical MTase motifs, the CoV N7-MTase incorporates 12  $\beta$ -strands and 5  $\alpha$ -helices that form a five-stranded  $\beta$ -sheet core (Ferron, Subissi et al. 2018, Ferron, Debat et al. 2020). The overall nsp14 structure reveals two domains interconnected by a hinge that may confer the flexibility needed to orchestrate the different functions of the protein during CoV replication (Ferron, Subissi et al. 2018). Furthermore, the protein binds to nsp10, a critical co-factor for nsp14's ExoN activity (Bouvet, Imbert et al. 2012, Bouvet, Lugari et al. 2014). The conversion of a 5'-terminal GMP cap (GpppN) into a cap-0 structure ( $^7m$ GpppN) involves multiple steps: stabilization of the RNA chain, SAM binding, methyl transfer to the N7 position of the cap, release of the methylated RNA substrate, and SAH release. Our structural analysis identified several residues with their side chains pointing towards the catalytic pocket, which could be classified as likely RNA- or SAM-binding motifs (Fig. 3A). Taking into account the sequence conservation between MHV, SARS-CoV, SARS-CoV-2 and MERS-CoV (Fig. 2), we surmised these CoV N7-MTases to have an overall similar fold and structural organization. The impact of alanine substitutions of selected key residues in these motifs was then evaluated both *in vitro*, using recombinant nsp14, and in the context of the complete viral replication cycle, by engineering the corresponding virus mutants in different  $\beta$ -CoVs.

Although the biochemical and virological data presented in this study clearly provide support for the predictions from our structural analysis, the overall interpretation of the data set undeniably is much more complex than anticipated. Replacement of conserved SARS-CoV and MERS-CoV N7-MTase residues largely or completely abrogated enzymatic activity *in vitro* (Fig. 4C and 4D), supporting their identification as key residues for the enzyme's functionality. However, for several SARS-CoV and MERS-CoV mutations the data on enzymatic activity *in vitro* and virus mutant viability appeared to be at odds with each other (Fig. 4 and 6). One possible interpretation is that (very) low levels of N7-MTase activity may still suffice to support viral replication in cell culture models. Alternatively, the *in vitro* N7-MTase assays may have suffered from technical complications such as suboptimal or incorrect (mutant) protein folding in contrast to nsp14 expressed in the context of the virus and its different partner proteins.. Mutations mapping to motif VI (hinge region), and for MERS-CoV also to motif III (G333A), yielded inconsistent results when comparing prior *in vitro* studies (Chen, Cai et al. 2009, Bouvet,



Debarnot et al. 2010, Bouvet, Imbert et al. 2012, Chen, Tao et al. 2013, Jin, Chen et al. 2013, Ma, Wu et al. 2015), which might be attributed (in part) to different *in vitro* assay conditions.

Such technical explanations, however, do not apply when introducing equivalent substitutions in different  $\beta$ -CoVs and evaluating them in the context of the viral replication cycle. Also here apparent inconsistencies were observed in terms of the variable impact of certain mutations on the overall replication of virus mutants. The results obtained with mutations in motif III (the presumed SAM binding motif DxGxPxG/A) were a striking example: the viral phenotype for the D-to-A mutant (D331A in SARS-CoV, D330A in MHV) ranged from non-viable for SARS-CoV to wild type-like for MHV (Fig. 6). SARS-CoV residue D331 was first identified as important for N7-MTase activity by the superimposition of nsp14 with cellular N7-MTase structures (Chen, Cai et al. 2009). However, a previous MHV study (Case, Ashbrook et al. 2016) had already documented that a D330A substitution did not affect MHV replication, and pointed to G332 as a more important residue in motif III, which was confirmed in this study (Fig. 6). These results are consistent with the SARS-CoV nsp14 crystal structure showing that residue G333 in the DxG motif (G332 in MHV) is in direct contact with the SAM methyl donor (Ma, Wu et al. 2015), although apparently its replacement is not sufficient to render all  $\beta$ -CoVs non-viable.

The only other N7-MTase position probed by reverse genetics so far was the conserved tyrosine in motif VI (Fig. 3B; Y414 in MHV). This residue attracted attention by the intriguing serendipitous finding that its replacement with histidine did not affect replication of MHV strain A59 in cell culture, but strongly reduced replication and virulence in mice (Sperry, Kazi et al. 2005). Also, an Y414A substitution was tolerated in MHV-A59 (Eckerle, Brockway et al. 2006), but in our study Y414A prevented the recovery of infectious progeny for MHV strain JHM, which exhibits less robust RNA synthesis and overall replication than MHV-A59. The results for the corresponding SARS-CoV (non-viable) and MERS-CoV (crippled) mutants were also variable, adding to the complexity of the overall picture.

A substantial set of N7-MTase mutations was monitored for ‘side effects’ at the level of ExoN activity (Fig. 5), although for SARS-CoV and MHV these would unlikely explain a lack of viability as ExoN knock-out mutants for both these viruses are only mildly crippled (Eckerle, Brockway et al. 2006, Eckerle, Lu et al. 2007, Smith, Blanc et al. 2013). Strikingly, for MERS-CoV, which does not tolerate ExoN inactivation (Ogando, Zevenhoven-Dobbe et al. 2020), two of the N7-MTase mutations (G333A in motif III and H420A in motif VI) abolished detectable ExoN activity *in vitro* (Fig. 5B), but still allowed a certain level of virus replication (small-plaque phenotype), an



observation that clearly warrants further investigation. In more general terms, the ExoN biochemical assay (Fig. 5) suggested that the functional separation between the two enzyme domains may be less strict than previously concluded, as also recently hypothesized following an *in silico* analysis (Moeller, Shi et al. 2021). Alternatively, structural variation may explain the discrepancies observed. The impact of SARS-CoV N7-MTase motif-VI mutations on ExoN activity was major, highlighting the peculiar structural organization of nsp14, in which part of the N7-MTase substrate-binding cavity maps to the hinge that connects the N7-MTase and ExoN domains (Fig. 1). For other N7-MTase motifs probed, the functional separation from ExoN was confirmed, as also deduced from previous studies (Chen, Cai et al. 2009, Chen, Tao et al. 2013, Ma, Wu et al. 2015, Ogando, Zevenhoven-Dobbe et al. 2020).

In our  $\beta$ -CoV reverse genetics studies, a consistent phenotype was observed only for N7-MTase mutants R310A (motif II, non-viable), H424A (motif VI, crippled), and F426A (motif VI, non-viable). SARS-CoV residue R310 was previously reported to play a role in SAM binding (Chen, Tao et al. 2013), whereas F426 was proposed to entrench and stabilize the guanosine's purine moiety in proximity of SAM (Ma, Wu et al. 2015). Our analysis (Fig. 3B) redefined both residues as part of putative RNA binding site motifs II and VI, respectively, and they were found to be essential for *in vitro* N7-MTase activity in both SARS-CoV and MERS-CoV. Our results highlight the importance of nsp14 N7-MTase for CoV replication, but the variable impact of the replacement of several conserved residues suggests a substantial degree of conformational or functional flexibility in the enzyme's active site. Other factors, such as interactions of nsp14 with other replicase subunits, may also contribute to the observed phenotypic differences between equivalent N7-MTase mutants of different  $\beta$ -CoVs. Likewise, the translation of *in vitro* N7-MTase activity to virus viability is not straightforward and suggests complex structure-function relationships for the structurally unique CoV N7-MTase. Given both its essential role in CoV replication and its emerging status as a target for antiviral drug development efforts, it will be important to further expand the integrated biochemical and virological analysis to support the rational design of broad-spectrum inhibitors of the CoV N7-MTase.

## Materials and Methods

**Bioinformatics analysis.** Forty-seven CoV nsp14 sequences were retrieved (a complete list is provided in Supplementary Table 1) and aligned using MAFFT (Nakamura, Yamada et al. 2018). Delineation of motif I to Vi was done manually using Seaview and WebLogo (Crooks, Hon et al. 2004, Gouy, Guindon et al. 2010). Structure analysis (PDB: 5NFY; (Ferron, Subissi et al. 2018)), volume estimation, cavity determination and sequence conservation was plotted onto the structure using UCSF Chimera (Pettersen, Goddard et al. 2004). Electrostatic surface calculations were done using APBS (Jurrus, Engel et al. 2018). Predicting the structural impact of mutations was done using the PoPMuSiC server (<http://dezyme.com/en/software>) (Dehouck, Kwasigroch et al. 2011). This program introduces single-site mutations into a protein's structure and estimates the change in  $\Delta\Delta G$ s values of such mutations. In the next step, all possible single-site mutations (4731 mutations) were sorted by their  $\Delta\Delta G$ s, but only those in the conserved motifs in the vicinity of the catalytic pocket were used for further studies. PopMuSiC predictions were cross-validated with SNAP2 to assess the impact of single amino acid substitutions on protein function (Hecht, Bromberg et al. 2015).

**Recombinant protein expression and purification.** Recombinant SARS- and MERS-CoV nsp10 and nsp14 were expressed in *E. coli* and purified as described previously (Bouvet, Debarnot et al. 2010), MERS-CoV-nsp14 (Aouadi, Eydoux et al. 2017, Ogando, Zevenhoven-Dobbe et al. 2020) and MERS-nsp10 (Chen, Su et al. 2011, Wang, Sun et al. 2015). Vectors for mutant nsp14 expression were generated by QuikChange site-directed mutagenesis using Accuzyme DNA polymerase (Bioline) and verified by sequence analysis. For each recombinant protein used, two batches were produced and tested in enzymatic assays.

***In vitro* nsp14 N7-MTase activity assay.** Reaction mixtures contained 50 or 200 nM of SARS-CoV or MERS-CoV recombinant nsp14, 7 nM GpppACCCC synthetic RNA substrate, 40 mM Tris-HCl (pH 8.0), 10 mM DTT, 5 mM MgCl<sub>2</sub>, 1.9  $\mu$ M SAM, 0.1  $\mu$ M 3H-SAM (Perkin Elmer). After a 30-min incubation at 30°C, the assay was stopped by addition of a 10-fold volume of ice-cold 100  $\mu$ M S-adenosyl-homocysteine (SAH; Thermo Fisher). Samples were spotted on DEAE filter mats (PerkinElmer) and washed twice with 10 mM ammonium formate (Sigma-Aldrich) (pH 8.0), twice with MilliQ water, and once with absolute ethanol (Sigma-Aldrich) (Bouvet, Debarnot et al.

2010), and MTase activity was quantified using a Wallac scintillation counter. To determine relative enzyme activities, the incorporation measurements for mutant proteins were normalized to values obtained with wild-type nsp14. Samples were measured in duplicate in each experiment.

***In vitro* nsp14 ExoN assay.** Synthetic RNA substrate H4 (Bouvet, Imbert et al. 2012) was radiolabeled at its 5' end using T4 polynucleotide kinase (Epicentre) and [ $\gamma$ - $^{32}$ P]ATP (Perkin Elmer) and used as substrate in ExoN activity assays. To this end, recombinant SARS-CoV or MERS-CoV nsp14 and nsp10 proteins were mixed in a 1:4 concentration ratio of nsp14:nsp10 as indicated in Fig. 5 and added to 750 nM radiolabeled substrate in their respective reaction buffer (40 mM Tris-HCl (pH 8), 1 mM MgCl<sub>2</sub>, 5 mM DTT for SARS-CoV; 40 mM Tris-HCl (pH 7.5), 5 mM MgCl<sub>2</sub> and 1 mM DTT for MERS-CoV). Assays were performed at 37°C and stopped by addition of an equal volume of loading buffer containing 96% formamide and 10 mM EDTA. Samples were analyzed on 7 M urea-containing 14% (wt/vol) polyacrylamide gels (acrylamide/bisacrylamide ratio, 19:1) buffered with 0.5xTris-taurine-EDTA and run at high voltage (1,600 V). Results were visualized by phosphorimaging using a Typhoon-9410 variable-mode scanner (GE Healthcare).

**Cell culture.** Baby hamster kidney cells (BHK-21; ATCC CCL10), Vero E6 (ATCC; CCL-81), HuH7 cells and mouse 17 Cl1 cells were grown as described previously (Nedialkova, Gorbalenya et al. 2010, de Wilde, Raj et al. 2013, Ogando, Zevenhoven-Dobbe et al. 2020, Snijder, Limpens et al. 2020). In order to amplify viral progeny and titrate recombinant CoVs by plaque assay, Vero E6 cells were used for SARS-CoV and SARS-CoV-2, HuH7 cells for MERS-CoV, and 17Cl1 cells for MHV. Cells were cultured in Eagle's minimal essential medium (EMEM; Lonza) with 8% fetal calf serum (FCS; Bodinco) supplemented with 100 IU/ml of penicillin and 100 µg/ml of streptomycin (Sigma) and 2 mM L-Glutamine (PAA Laboratories). After infection, complete EMEM medium containing 2% FCS was used.

**Viruses and reverse genetics.** Mutations in the nsp14-coding region were engineered by two-step *en passant* recombineering in *E. coli* (Tischer, Smith et al. 2010) using a bacterial artificial chromosome (BAC) vector with a full-length cDNA copy of a  $\beta$ -CoV genome. Virus isolates used were MERS-CoV strain EMC/2012 (Almazan, DeDiego et al. 2013, Rabouw, Langereis et al.

2016)), SARS-CoV Frankfurt-1 (Pfefferle, Krahling et al. 2009), MHV-JHM-IA (Fehr, Athmer et al. 2015)}, and SARS-CoV-2 BetaCoV/Wuhan/IVDC-HB-01/2019 (Thao, Labroussaa et al. 2020). When designing mutations, an additional translationally silent marker mutations was introduced near the site of mutagenesis, in order to analyze possible reversion and rule out potential contaminations with parental virus. For each mutant, two independent BAC clones were obtained, verified by sequencing of the nsp14-coding region, and used for *in vitro* transcription (mMessage-mMachine T7 Kit; Ambion) and virus launching. Transfections with full-length RNA transcripts were performed as described before (Ogando, Zevenhoven-Dobbe et al. 2020). Briefly, 5 µg RNA was electroporated into BHK-21 cells using an Amaxa nucleofector 2b (program A-031) and Nucleofection T solution kit (Lonza). Transfected BHK-21 cells were mixed in a 1:1 ratio with cells susceptible to CoV infection: Vero E6 cells (for SARS-CoV and SARS-CoV-2), HuH7 cells for MERS-CoV, or 17Cl1 cells (for MHV). Cell culture supernatants were collected when full cytopathic effect was observed, or at 6 days post transfection and progeny virus titers were determined by plaque assay (van den Worm, Eriksson et al. 2012). Viral replication was also monitored by immunofluorescence microscopy using antibodies recognizing double-stranded RNA (dsRNA; (Weber, Wagner et al. 2006)) and non-structural or structural CoV proteins (van Hemert, van den Worm et al. 2008, de Wilde, Raj et al. 2013, Ogando, Zevenhoven-Dobbe et al. 2020). To confirm the presence of the original mutations in viral progeny, supernatant from transfected cells was used to infect fresh cells, after which intracellular RNA was isolated with TriPure isolation reagent (Roche Applied Science). Next, the nsp14-coding region was amplified using standard RT-PCR methods and the purified amplicon was sequenced by Sanger sequencing. All work with live (recombinant) class-3 CoVs was done in a biosafety level 3 laboratory at Leiden University Medical Center.

## Acknowledgments

N.S.O. was supported by the Marie Skłodowska-Curie ETN European Training Network 'ANTIVIRALS' (EU Grant Agreement No. 642434). P.E.K. was the recipient of a scholarship from the Fondation "Méditerranée Infection". This work was supported by the Fondation pour la Recherche Médicale (Aide aux Équipes) and the SCORE project (EU Horizon 2020 research and innovation program, grant agreement 101003627). We thank LUMC colleagues Tessa Nelemans, Brenda Bontes and Jessika Zevenhoven-Dobbe for excellent technical support.

**Figure 1. Global architecture of coronavirus nsp14 (PDB 5NFY).** (A) Architecture of SARS-CoV nsp14 showing the N-terminal ExoN domain (Yellow), inter-domain hinge (blue), C-terminal N7-MTase domain (brown). (B) Side and top view of the hinge region and N7-MTase domain. The three strands of the hinge (blue) protrude from the N7-MTase domain (brown). (C) Analysis of the volume of the N7-MTase active site, with the cavity highlighted in green. (D) Electrostatic surface representation of the CoV nsp14 hinge region and N7-MTase domain. Surface electrostatic potential calculated by Adaptive Poisson-Boltzmann Solver, from - 10 (red) to + 10 (blue) kT/e.

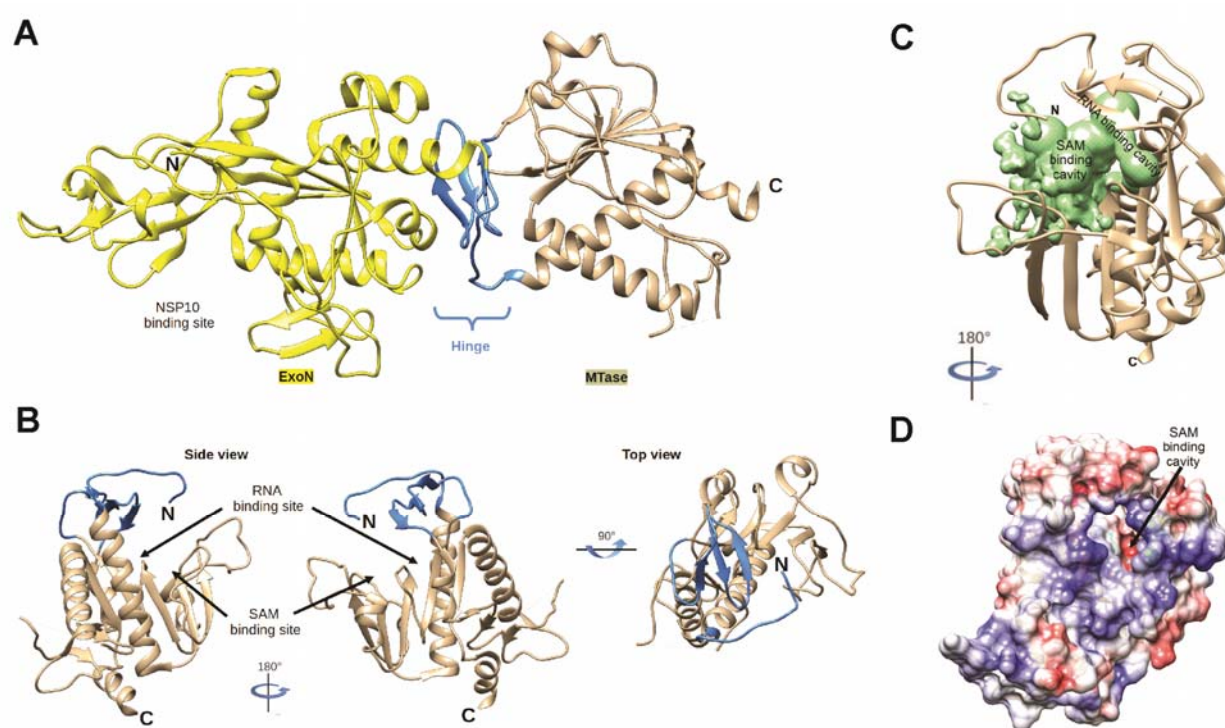

**Figure 2. Coronavirus-wide nsp14 N7-MTase conservation analysis.** CoV nsp14 amino acid sequence conservation plotted on the structure (PDB 5NFY) of the SARS-CoV hinge region and N7-MTase domain (dark blue to white representing 100% to less than 50% sequence identity). A table of sequences used for comparison is presented in Table S1.

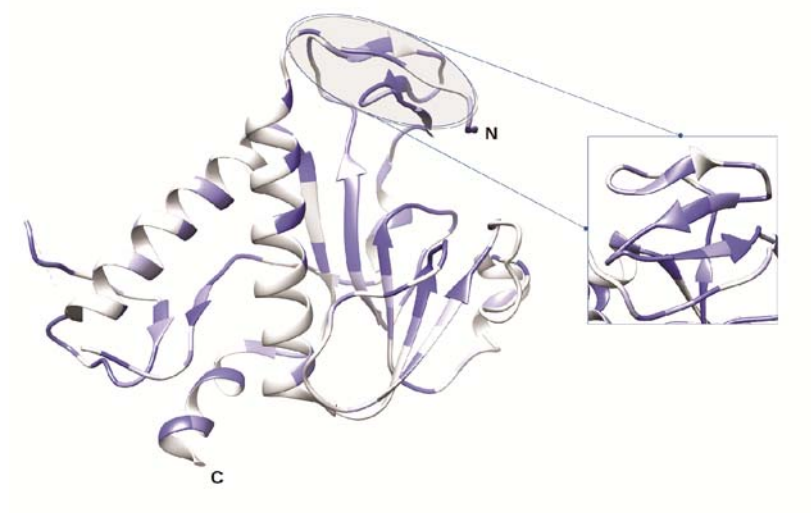



**Figure 3. Coronavirus-wide nsp14 N7-MTase sequence and structural analysis.** (A) Close-up of identified conserved motifs/residues in the N7-MTase catalytic pocket. B) WebLogo representation of 6 conserved motifs (I-VI) identified in the catalytic pocket. Each motif is highlighted with a specific color (matching that in panel A) and categorized as a proposed SAM- or RNA-binding motif. Black stars highlight charged or aromatic residues most likely involved in ligand binding or catalytic activity. C) Projected impact on folding free energy by alanine substitutions of the identified core residues on the N7-MTase structure, as calculated by PoPMusic.

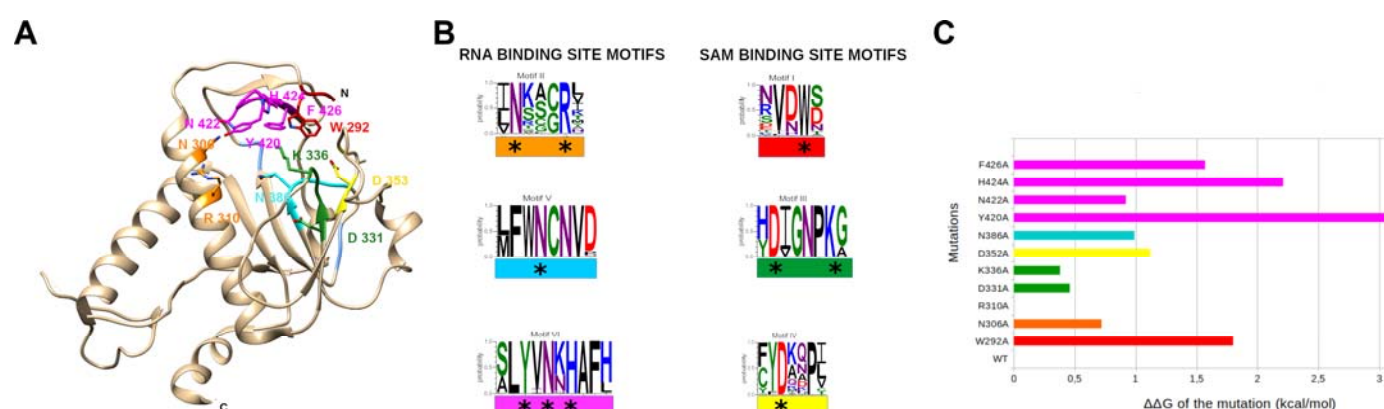



**Fig. 4. Expression and *in vitro* N7-MTase activity of SARS-CoV and MERS-CoV nsp14 mutants.** Recombinant SARS-CoV (A) and MERS-CoV (B) wild-type and mutant nsp14 proteins were expressed in *E. coli* and purified. Proteins were analyzed using 10% SDS-PAGE gels stained with Coomassie blue. The *in vitro* N7-MTase activity of SARS-CoV (C) and MERS-CoV (D) nsp14 mutants was determined using an assay with a GpppACCCC synthetic RNA substrate and radiolabeled SAM as methyl donor. Nsp14 concentrations (of 50 and 200 nM) were used, as indicated. N7-MTase activities were compared to those of the respective wild-type nsp14 controls. For MERS-CoV, ExoN knockout mutant D90A/E92A was included as a control.

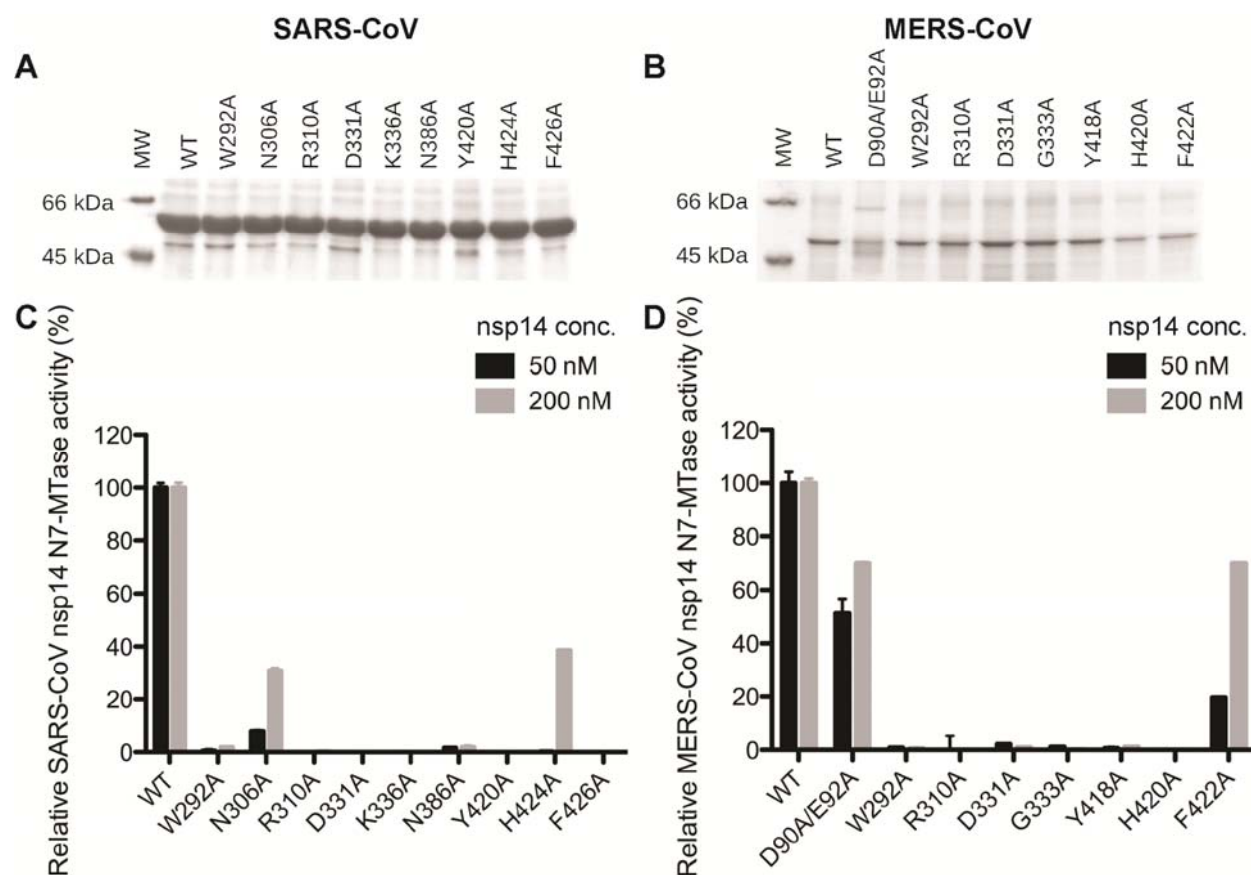

# **Fig. 5. *In vitro* Exoribonuclease activity of SARS-CoV and MERS-CoV N7-MTase mutants.**

The *in vitro* ExoN activity of SARS-CoV (A) and MERS-CoV (B) mutant nsp14 proteins (Fig. 3) was determined by monitoring the degradation of a 5' radiolabeled RNA substrate (see Methods). An nsp14 concentration of 200 or 500 nM was used (as indicated) and a fourfold molar excess of the corresponding nsp10 was added. A time course assay was performed using time points 0, 1, 10 and 30 min for SARS-CoV and 0, 1, 10, 30, 60, and 120 min for MERS-CoV nsp14. Reaction products were analyzed by denaturing gel electrophoresis and autoradiography.

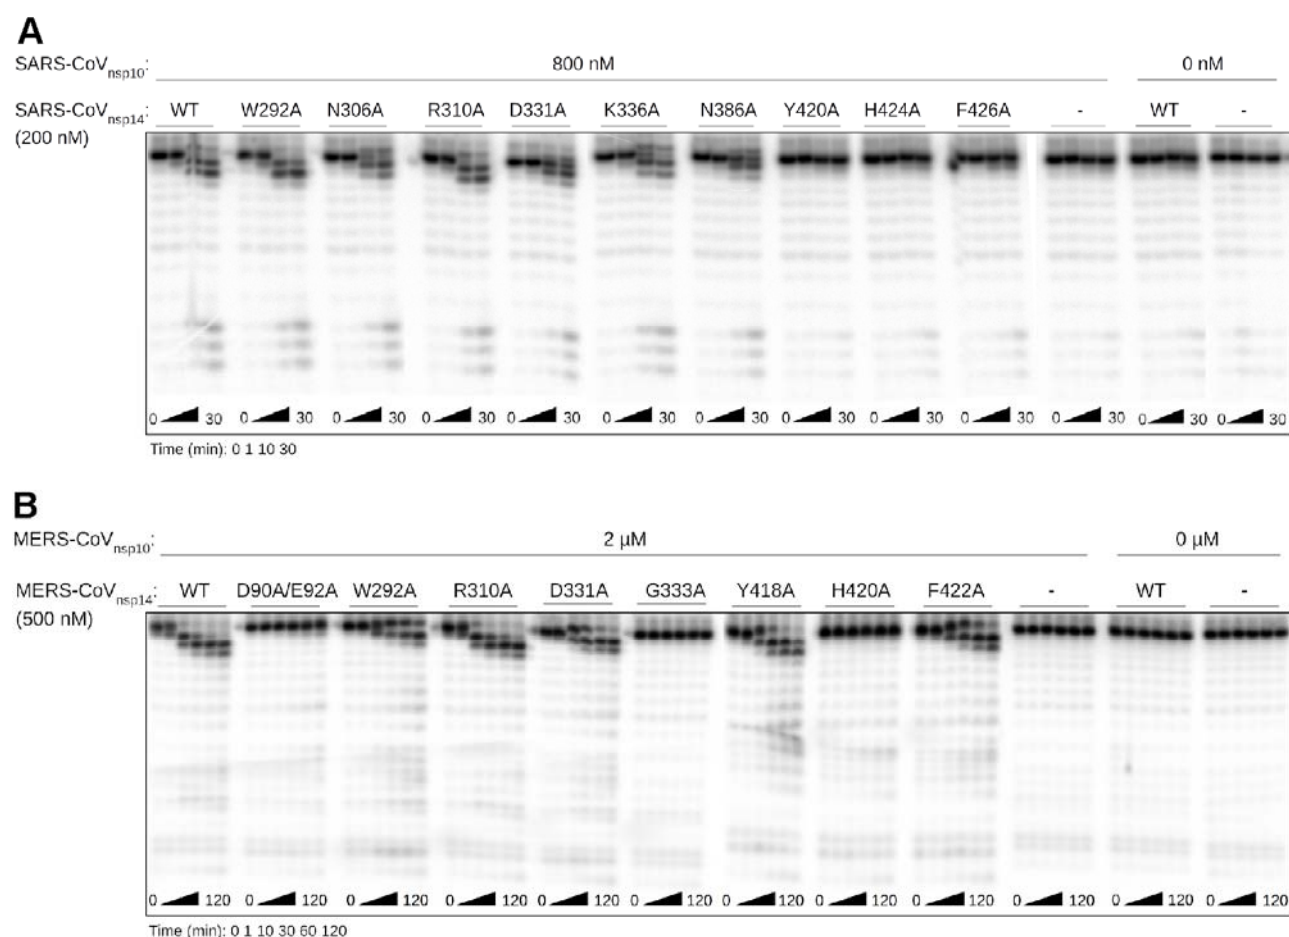

**Fig. 6. Virological characterization of  $\beta$ -CoV N7-MTase mutants.** (A) Overview of the phenotype of CoV mutants that were evaluated by reverse engineering N7-MTase mutations into the genomes of SARS-CoV, MERS-CoV, MHV and SARS-CoV-2. The amino acid number indicated for each mutation refers to SARS-CoV nsp14. N.P., not performed. (B) Plaque phenotype of viable N7-MTase mutants. Plaque assays were performed using supernatants harvested from transfected cells at 3 (MERS-CoV and SARS-CoV) or 4 days (MHV) post transfection.

**A**

| N7-MTase Motif | nsp14 mutation | Mutant phenotype          |                           |                         |            |
|----------------|----------------|---------------------------|---------------------------|-------------------------|------------|
|                |                | SARS-CoV                  | MERS-CoV                  | MHV                     | SARS-CoV-2 |
| I              | W292A          | viable; severely crippled | non-viable                | non-viable              | N.P.       |
|                | N306A          | viable; like wt           | N.P.                      | N.P.                    | N.P.       |
| II             | R310A          | non-viable                | non-viable                | non-viable              | non-viable |
|                | D331A          | non-viable                | viable; severely crippled | viable; like wt         | N.P.       |
| III            | G333A          | non-viable                | viable; severely crippled | non-viable              | N.P.       |
|                | K336A          | viable; mildly crippled   | N.P.                      | N.P.                    | N.P.       |
| V              | N386A          | non-viable                | N.P.                      | N.P.                    | N.P.       |
| VI             | Y420A          | non-viable                | viable; severely crippled | non-viable              | N.P.       |
|                | H424A          | viable; severely crippled | viable; severely crippled | viable; mildly crippled | N.P.       |
|                | F426A          | non-viable                | non-viable                | non-viable              | non-viable |

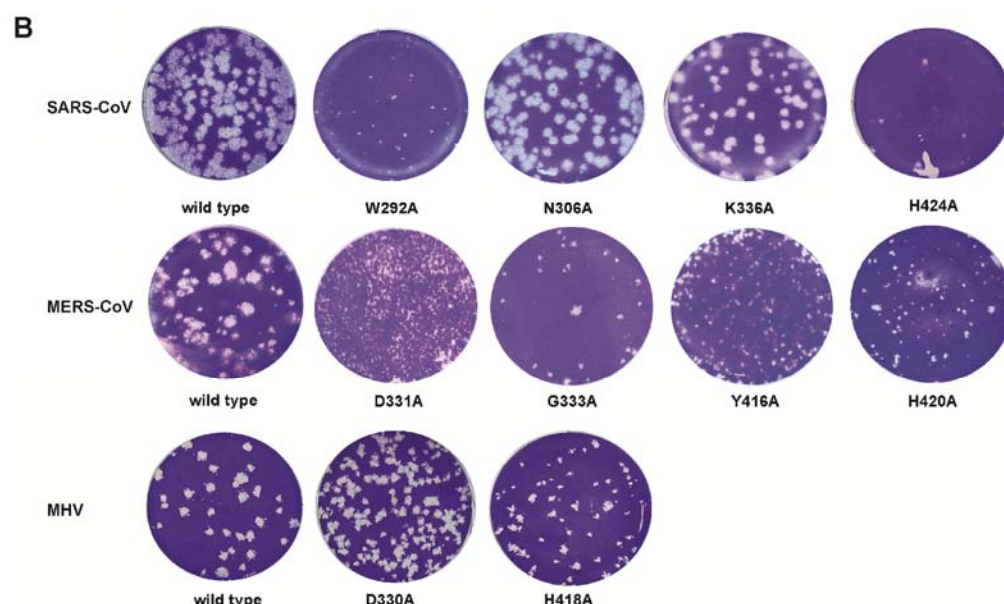

**Supplementary Figure 1.** Catalytic site of CoV nsp14 Hinge and N7-MTase domain structure analysis. A) Determination of the volume of the catalytic site (green bubble placing the mold of the cavity B) Electrostatic surface representation of CoV nsp14 Hinge and N7-MTase domain structure. Surface electrostatic potential calculated by APBS from - 10 (red) to + 10 (blue) kT/e.

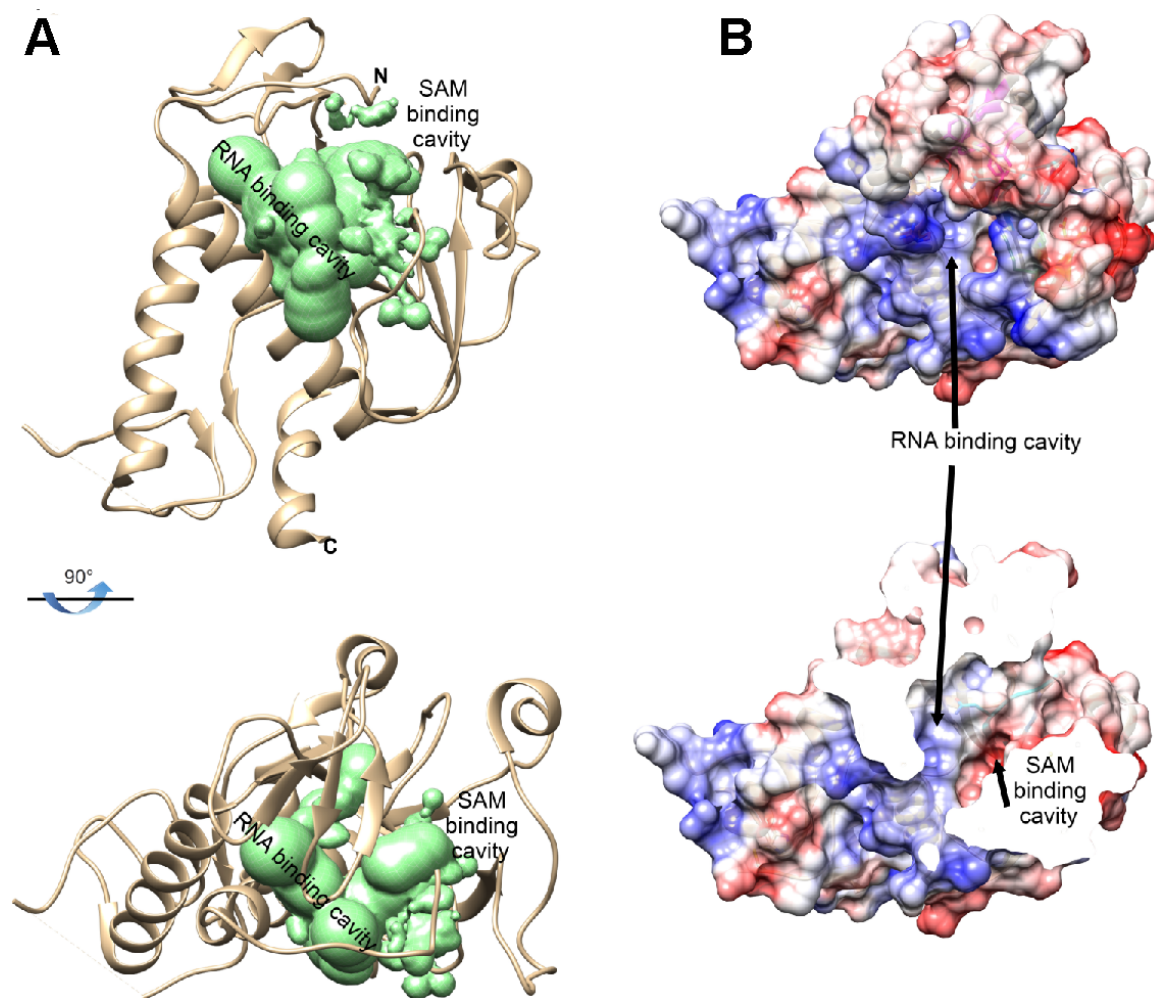

**Supplementary table 1-** List of CoV genomes and accession numbers used to extract nsp14 sequences for structural studies

| <b>Virus</b>                                                 | <b>Accession number</b> |
|--------------------------------------------------------------|-------------------------|
| Alphacoronavirus BtMs-AlphaCoV/GS 2013                       | A0A0U1WHG4              |
| Avian infectious bronchitis virus (IBV)                      | P0C6Y2                  |
| Bat coronavirus 1A                                           | YP_001718603.1          |
| Bat coronavirus BM48-31                                      | E0XIZ2                  |
| Bat coronavirus CDPHE15/USA/200 6                            | YP_008439224.1          |
| Bat coronavirus HKU4                                         | P0C6W3                  |
| Bat coronavirus HKU5                                         | P0C6W4                  |
| Bat coronavirus HKU9                                         | P0C6W5                  |
| Bat Hp- betacoronavirus                                      | A0A088DIE1              |
| Beluga whale coronavirus SW1                                 | YP_001876435.1          |
| Betacoronavirus Erinaceus                                    | U5KNA9                  |
| Betacoronavirus HKU24                                        | A0A0A7UXR0              |
| Bovine coronavirus                                           | P0C6W8                  |
| BtMr-AlphaCoV/ SAX2011                                       | A0A0U1UZC3              |
| BtNv-AlphaCoV/SC2013                                         | YP_009201729.1          |
| BtRf-AlphaCoV/HuB2013                                        | YP_009199789.1          |
| Camel alphacoronavirus                                       | ALA50136.1              |
| Common moorhen coronavirus HKU21                             | H9BR34                  |
| Feline infectious peritonitis virus                          | AGZ84515.1              |
| Ferret coronavirus                                           | YP_009256195.1          |
| Human coronavirus 229E (HCoV-229E)                           | P0C6X1                  |
| Human coronavirus HKU1 (HCoV-HKU1)                           | P0C6X2                  |
| Human coronavirus NL63 (HCoV-NL63)                           | P0C6X5                  |
| Lucheng Rn rat coronavirus                                   | YP_009336483.1          |
| Magpie-robin coronavirus HKU18                               | H9BR07                  |
| Middle East respiratory syndrome-related coronavirus         | K9N7C7                  |
| Miniopterus bat coronavirus HKU8                             | YP_001718610.1          |
| Mink coronavirus strain WD1127                               | YP_009019180            |
| Munia coronavirus HKU13-3514                                 | YP_002308505.1          |
| Murine coronavirus (strain A59) (MHV- A59)                   | P0C6X9                  |
| Night heron coronavirus HKU19                                | H9BR16                  |
| Porcine deltacoronavirus                                     | A0A140ESF0              |
| Porcine epidemic diarrhea virus                              | NP_839967               |
| Rabbit coronavirus HKU14                                     | H9AA60                  |
| Rat coronavirus Parker                                       | YP_009924380.1          |
| Rhinolophus bat coronavirus HKU2                             | A8JNZ0                  |
| Rousettus bat coronavirus                                    | A0A1B3Q5W8              |
| Rousettus bat coronavirus HKU10                              | AFU92103                |
| Scotophilus bat coronavirus 512                              | YP_001351683            |
| Severe acute respiratory syndrome coronavirus (SARS-CoV)     | P0C6X7                  |
| Severe acute respiratory syndrome coronavirus-2 (SARS-CoV-2) | P0DTD1                  |
| Sparrow coronavirus HKU17                                    | H9BQZ9                  |

|                                                         |                |
|---------------------------------------------------------|----------------|
| Swine acute diarrhea syndrome related coronavirus BtRf2 | AVM80482.1     |
| Thrush coronavirus HKU12                                | B6VDX7         |
| Turkey coronavirus                                      | YP_001941187   |
| White-eye coronavirus HKU16                             | YP_005352837.1 |
| Wigeon coronavirus HKU20                                | H9BR24         |

**Supplementary Table 2:** Functional effects of mutations on nsp14 SARS-CoV, MERS-CoV, MHV predicted with SNAP2.

| AA Substitution | SARS-CoV | MERS-CoV | MHV  | SARS-CoV | MERS-CoV | MHV  | SARS-CoV | MERS-CoV | MHV  | SARS-CoV | MERS-CoV | MHV  |
|-----------------|----------|----------|------|----------|----------|------|----------|----------|------|----------|----------|------|
|                 | W292     | W292     | W291 | N306     | N306     | N305 | R310     | R310     | R309 | D331     | D331     | D330 |
| A               | 72       | 66       | 78   | 51       | 26 *     | 54   | 66       | 30 *     | 63   | 75       | 67       | 78   |
| R               | 82       | 81       | 88   | 75       | 32 *     | 82   |          |          |      | 91       | 80       | 90   |
| N               | 80       | 63       | 86   |          |          |      | 71       | 41       | 71   | 77       | 78       | 83   |
| D               | 88       | 72       | 91   | 67       | 58       | 78   | 85       | 74       | 84   |          |          |      |
| C               | 59       | 62       | 69   | 48       | 22 *     | 58   | 65       | 18 *     | 63   | 73       | 65       | 76   |
| Q               | 76       | 74       | 84   | 48       | 35 *     | 65   | 60       | 32 *     | 61   | 81       | 79       | 84   |
| E               | 82       | 72       | 87   | 73       | 63       | 82   | 81       | 61       | 78   | 70       | 73       | 74   |
| G               | 82       | 82       | 87   | 53       | 41       | 64   | 81       | 31 *     | 79   | 79       | 84       | 88   |
| H               | 78       | 62       | 86   | 50       | 36 *     | 63   | 59       | 29 *     | 60   | 87       | 84       | 89   |
| I               | 72       | 69       | 79   | 71       | 35 *     | 77   | 73       | 35 *     | 71   | 88       | 85       | 89   |
| L               | 73       | 75       | 82   | 72       | 35 *     | 79   | 73       | 21 *     | 70   | 90       | 81       | 91   |
| K               | 85       | 84       | 90   | 63       | 59       | 80   | 41       | 20 *     | 45   | 91       | 91       | 92   |
| M               | 66       | 71       | 78   | 63       | 34 *     | 73   | 66       | 29 *     | 65   | 87       | 84       | 89   |
| F               | 45       | 55       | 63   | 74       | 52       | 80   | 81       | 52       | 78   | 89       | 80       | 90   |
| P               | 83       | 89       | 94   | 77       | 64       | 83   | 86       | 70       | 85   | 91       | 91       | 93   |
| S               | 78       | 77       | 78   | 41       | 22 *     | 58   | 70       | 32 *     | 68   | 74       | 74       | 80   |
| T               | 78       | 80       | 86   | 49       | 24 *     | 64   | 69       | 32 *     | 66   | 79       | 77       | 83   |
| W               |          |          |      | 81       | 70       | 86   | 87       | 66       | 85   | 92       | 88       | 93   |
| Y               | 29 *     | 50       | 52   | 70       | 54       | 77   | 79       | 53       | 77   | 90       | 83       | 91   |
| V               | 71       | 60       | 78   | 67       | 26 *     | 76   | 74       | 38 *     | 72   | 87       | 83       | 88   |



| AA Substitution | SARS-CoV | MERS-CoV | MHV   | SARS-CoV | MERS-CoV | MHV  | SARS-CoV | MERS-CoV | MHV  | SARS-CoV | MERS-CoV | MHV  |
|-----------------|----------|----------|-------|----------|----------|------|----------|----------|------|----------|----------|------|
|                 | K336     | K336     | K335  | D352     | D352     | D349 | N386     | N382     | N380 | Y420     | Y416     | Y414 |
| A               | 31 *     | 20 *     | 39 *  | 34 *     | 63       | 73   | 60       | 45       | 56   | 71       | 66       | 74   |
| R               | -17 *    | -20 *    | -1 *  | 45       | 85       | 87   | 78       | 73       | 77   | 89       | 85       | 91   |
| N               | 28 *     | 26 *     | 44    | 22 *     | 73       | 69   |          |          |      | 86       | 71       | 88   |
| D               | 69       | 63       | 76    |          |          |      | 62       | 56       | 63   | 90       | 73       | 92   |
| C               | 22 *     | 7 *      | -16 * | 27 *     | 57       | 69   | 60       | 15       | 57   | 61       | 54       | 64   |
| Q               | 16 *     | 6 *      | 29 *  | 43       | 74       | 73   | 47       | 52       | 64   | 82       | 77       | 86   |
| E               | 52       | 45       | 60    | 26 *     | 67       | 53   | 75       | 70       | 74   | 87       | 82       | 89   |
| G               | 52       | 41       | 60    | 49       | 77       | 78   | 51       | 55       | 49   | 87       | 81       | 88   |
| H               | 7 *      | -6 *     | 19 *  | 21 *     | 74       | 80   | 63       | 51       | 63   | 59       | 70       | 78   |
| I               | -15 *    | -70      | -40 * | 59       | 78       | 86   | 77       | 53       | 76   | 69       | 62       | 70   |
| L               | 22 *     | 8 *      | 33 *  | 61       | 80       | 88   | 80       | 49       | 78   | 74       | 70       | 74   |
| K               |          |          |       | 48       | 87       | 88   | 76       | 71       | 76   | 90       | 86       | 91   |
| M               | 10 *     | -39 *    | 18 *  | 55       | 78       | 84   | 74       | 52       | 73   | 78       | 72       | 79   |
| F               | 52       | 41       | 55    | 23 *     | 71       | 87   | 81       | 67       | 80   | 42       | 47       | 40   |
| P               | 62       | 30 *     | 69    | 72       | 89       | 89   | 71       | 76       | 82   | 88       | 91       | 94   |
| S               | 22 *     | 13 *     | 36 *  | 29 *     | 65       | 65   | 44       | 31       | 42   | 85       | 69       | 86   |
| T               | 26 *     | 13 *     | 39 *  | 34 *     | 69       | 69   | 51       | 30 *     | 33 * | 86       | 79       | 88   |
| W               | 67       | 56       | 67    | 66       | 81       | 90   | 87       | 78 *     | 86   | 68       | 71       | 71   |
| Y               | 48       | 35 *     | 51    | 32 *     | 76       | 86   | 79       | 38 *     | 78   |          |          |      |
| V               | 22 *     | 8 *      | 32 *  | 53       | 76       | 83   | 75       | 41       | 75   | 68       | 49       | 70   |

| AA Substitution | SARS-CoV | MERS-CoV | MHV  | SARS-CoV | MERS-CoV | MHV  | SARS-CoV | MERS-CoV | MHV  |
|-----------------|----------|----------|------|----------|----------|------|----------|----------|------|
|                 | N422     | N418     | N416 | H424     | H420     | H418 | F426     | F422     | F420 |
| A               | 66       | 33 *     | 69   | 63       | 62       | 64   | 56       | 59       | 67   |
| R               | 81       | 72       | 84   | 74       | 26 *     | 35 * | 83       | 81       | 85   |
| N               |          |          |      | 63       | 70       | 65   | 82       | 79       | 83   |
| D               | 64       | 65       | 79   | 84       | 86 *     | 85   | 89       | 88       | 90   |
| C               | 61       | 41       | 66   | 64       | 20       | 64   | 48 *     | 39 *     | 50   |
| Q               | 64       | 4 *      | 70   | 65       | 69       | 67   | 78       | 72       | 80   |
| E               | 80       | 71       | 83   | 79       | 81       | 80   | 84       | 72       | 85   |
| G               | 64       | 20 *     | 64   | 75       | 66       | 76   | 81       | 79       | 83   |
| H               | 60       | 49       | 67   |          |          |      | 59       | 76       | 79   |
| I               | 79       | 71       | 83   | 76       | 69       | 76   | 58 *     | 10 *     | 60   |
| L               | 81       | 72       | 85   | 76       | 41       | 75   | 63       | 50       | 59   |
| K               | 79       | 69       | 81   | 81       | 81       | 82   | 85       | 82       | 87   |
| M               | 76       | 63       | 80   | 72       | 65       | 72   | 60       | 49       | 47   |
| F               | 69       | 74       | 85   | 64       | 75       | 76   |          |          |      |
| P               | 84       | 76       | 87   | 90       | 90       | 90   | 89       | 87       | 91   |
| S               | 52       | -3 *     | 59   | 70       | 71       | 72   | 79       | 75       | 80   |
| T               | 59       | 42       | 65   | 64       | 72       | 76   | 78       | 60       | 80   |
| W               | 88       | 81       | 90   | 81       | 82       | 82   | 69       | 69       | 67   |
| Y               | 79       | 71       | 83   | 65       | 70       | 67   | 49       | 49       | 49   |
| V               | 78       | 65       | 81   | 71       | 54       | 72   | 62 *     | 37 *     | 65   |

All data are predicted above 70 % expected accuracy except for \* above 53 % - Positive value indicates a destabilising effect - Negative value indicates a neutral effect.

## References

- Ahmed-Belkacem, R., P. Sutto-Ortiz, M. Guiraud, B. Canard, J. J. Vasseur, E. Decroly and F. Debart (2020). "Synthesis of adenine dinucleosides SAM analogs as specific inhibitors of SARS-CoV nsp14 RNA cap guanine-N7-methyltransferase." *Eur J Med Chem* **201**: 112557.
- Almazan, F., M. L. DeDiego, I. Sola, S. Zuniga, J. L. Nieto-Torres, S. Marquez-Jurado, G. Andres and L. Enjuanes (2013). "Engineering a replication-competent, propagation-defective Middle East respiratory syndrome coronavirus as a vaccine candidate." *mBio* **4**(5): e00650-00613.
- Aouadi, W., C. Eydoux, B. Coutard, B. Martin, F. Debart, J. J. Vasseur, J. M. Contreras, C. Morice, G. Querat, M. L. Jung, B. Canard, J. C. Guillemot and E. Decroly (2017). "Toward the identification of viral cap-methyltransferase inhibitors by fluorescence screening assay." *Antiviral Res* **144**: 330-339.
- Barnes, M. H., P. Spacciapoli, D. H. Li and N. C. Brown (1995). "The 3'-5' exonuclease site of DNA polymerase III from gram-positive bacteria: definition of a novel motif structure." *Gene* **165**(1): 45-50.
- Basu, S., T. Mak, R. Ulferts, M. Wu, T. Deegan, R. Fujisawa, K. W. Tan, C. T. Lim, C. Basier, B. Canal, J. F. Curran, L. Drury, A. W. McClure, E. L. Roberts, F. Weissmann, T. U. Zeisner, R. Beale, V. H. Cowling, M. Howell, K. Labib and J. F. X. Diffley (2021). "Identification of SARS-CoV-2 Antiviral Compounds by Screening for Small Molecule Inhibitors of the nsp14 RNA Cap Methyltransferase." *bioRxiv*: 2021.2004.2007.438810.
- Bouvet, M., C. Debarnot, I. Imbert, B. Selisko, E. J. Snijder, B. Canard and E. Decroly (2010). "In vitro reconstitution of SARS-coronavirus mRNA cap methylation." *PLoS Pathog* **6**(4): e1000863.
- Bouvet, M., I. Imbert, L. Subissi, L. Gluais, B. Canard and E. Decroly (2012). "RNA 3'-end mismatch excision by the severe acute respiratory syndrome coronavirus nonstructural protein nsp10/nsp14 exoribonuclease complex." *Proc Natl Acad Sci U S A* **109**(24): 9372-9377.
- Bouvet, M., A. Lugari, C. C. Posthuma, J. C. Zevenhoven, S. Bernard, S. Betzi, I. Imbert, B. Canard, J. C. Guillemot, P. Lecine, S. Pfefferle, C. Drosten, E. J. Snijder, E. Decroly and X. Morelli (2014). "Coronavirus Nsp10, a critical co-factor for activation of multiple replicative enzymes." *J Biol Chem* **289**(37): 25783-25796.
- Byszewska, M., M. Smietanski, E. Purta and J. M. Bujnicki (2014). "RNA methyltransferases involved in 5' cap biosynthesis." *RNA Biol* **11**(12): 1597-1607.
- Case, J. B., A. W. Ashbrook, T. S. Dermody and M. R. Denison (2016). "Mutagenesis of S-adenosyl-l-methionine-binding residues in coronavirus nsp14 N7-methyltransferase demonstrates differing requirements for genome translation and resistance to innate immunity." *J Virol* **90**(16): 7248-7256.
- Chen, Y., H. Cai, J. Pan, N. Xiang, P. Tien, T. Ahola and D. Guo (2009). "Functional screen reveals SARS coronavirus nonstructural protein nsp14 as a novel cap N7 methyltransferase." *Proc Natl Acad Sci U S A* **106**(9): 3484-3489.
- Chen, Y., C. Su, M. Ke, X. Jin, L. Xu, Z. Zhang, A. Wu, Y. Sun, Z. Yang, P. Tien, T. Ahola, Y. Liang, X. Liu and D. Guo (2011). "Biochemical and structural insights into the mechanisms of SARS coronavirus RNA ribose 2'-O-methylation by nsp16/nsp10 protein complex." *PLoS Pathog* **7**(10): e1002294.
- Chen, Y., J. Tao, Y. Sun, A. Wu, C. Su, G. Gao, H. Cai, S. Qiu, Y. Wu, T. Ahola and D. Guo (2013). "Structure-function analysis of severe acute respiratory syndrome coronavirus RNA cap guanine-N7-methyltransferase." *J Virol* **87**(11): 6296-6305.
- Chouhan, B. P. S., S. Maimaiti, M. Gade and P. Laurino (2019). "Rossmann-Fold Methyltransferases: Taking a "beta-Turn" around Their Cofactor, S-Adenosylmethionine." *Biochemistry* **58**(3): 166-170.
- Crooks, G. E., G. Hon, J. M. Chandonia and S. E. Brenner (2004). "WebLogo: a sequence logo generator." *Genome Res* **14**(6): 1188-1190.

- Cui, J., F. Li and Z. L. Shi (2019). "Origin and evolution of pathogenic coronaviruses." Nat Rev Microbiol **17**(3): 181-192.
- de Wilde, A. H., V. S. Raj, D. Oudshoorn, T. M. Bestebroer, S. van Nieuwkoop, R. W. Limpens, C. C. Posthuma, Y. van der Meer, M. Barcena, B. L. Haagmans, E. J. Snijder and B. G. van den Hoogen (2013). "MERS-coronavirus replication induces severe in vitro cytopathology and is strongly inhibited by cyclosporin A or interferon-alpha treatment." J Gen Virol **94**(Pt 8): 1749-1760.
- Decroly, E., F. Ferron, J. Lescar and B. Canard (2011). "Conventional and unconventional mechanisms for capping viral mRNA." Nat Rev Microbiol **10**(1): 51-65.
- Decroly, E., I. Imbert, B. Coutard, M. Bouvet, B. Selisko, K. Alvarez, A. E. Gorbalenya, E. J. Snijder and B. Canard (2008). "Coronavirus nonstructural protein 16 is a cap-0 binding enzyme possessing (nucleoside-2'O)-methyltransferase activity." J Virol **82**(16): 8071-8084.
- Dehouck, Y., J. M. Kwasigroch, D. Gilis and M. Rooman (2011). "PoPMuSiC 2.1: a web server for the estimation of protein stability changes upon mutation and sequence optimality." BMC Bioinformatics **12**: 151.
- Denison, M. R., R. L. Graham, E. F. Donaldson, L. D. Eckerle and R. S. Baric (2011). "Coronaviruses: an RNA proofreading machine regulates replication fidelity and diversity." RNA Biol **8**(2): 270-279.
- Devkota, K., M. Schapira, S. Perveen, A. K. Yazdi, F. Li, I. Chau, P. Ghiabi, T. Hajian, P. Loppnau, A. Bolotokova, K. J. F. Satchell, K. Wang, D. Li, J. Liu, D. Smil, M. Luo, J. Jin, P. V. Fish, P. J. Brown and M. Vedadi (2021). "Probing the SAM Binding Site of SARS-CoV-2 nsp14 in vitro Using SAM Competitive Inhibitors Guides Developing Selective bi-substrate Inhibitors." bioRxiv: 2021.2002.2019.424337.
- Eckerle, L. D., S. M. Brockway, S. M. Sperry, X. Lu and M. R. Denison (2006). "Effects of mutagenesis of murine hepatitis virus nsp1 and nsp14 on replication in culture." Adv Exp Med Biol **581**: 55-60.
- Eckerle, L. D., X. Lu, S. M. Sperry, L. Choi and M. R. Denison (2007). "High fidelity of murine hepatitis virus replication is decreased in nsp14 exoribonuclease mutants." J Virol **81**(22): 12135-12144.
- Egloff, M. P., D. Benarroch, B. Selisko, J. L. Romette and B. Canard (2002). "An RNA cap (nucleoside-2'-O-)-methyltransferase in the flavivirus RNA polymerase NS5: crystal structure and functional characterization." EMBO J **21**(11): 2757-2768.
- Fehr, A. R., J. Athmer, R. Channappanavar, J. M. Phillips, D. K. Meyerholz and S. Perlman (2015). "The nsp3 macrodomain promotes virulence in mice with coronavirus-induced encephalitis." J Virol **89**(3): 1523-1536.
- Ferron, F., H. J. Debat, A. Shannon, E. Decroly and B. Canard (2020). "A N7-guanine RNA cap methyltransferase signature-sequence as a genetic marker of large genome, non-mammalian Tobaniviridae." NAR Genom Bioinform **2**(1): lqz022.
- Ferron, F., E. Decroly, B. Selisko and B. Canard (2012). "The viral RNA capping machinery as a target for antiviral drugs." Antiviral Res **96**(1): 21-31.
- Ferron, F., L. Subissi, A. T. Silveira De Moraes, N. T. T. Le, M. Sevajol, L. Gluais, E. Decroly, C. Vonnrhein, G. Bricogne, B. Canard and I. Imbert (2018). "Structural and molecular basis of mismatch correction and ribavirin excision from coronavirus RNA." Proc Natl Acad Sci U S A **115**(2): E162-E171.
- Gana, R., S. Rao, H. Huang, C. Wu and S. Vasudevan (2013). "Structural and functional studies of S-adenosyl-L-methionine binding proteins: a ligand-centric approach." BMC Struct Biol **13**: 6.
- Ge, X. Y., J. L. Li, X. L. Yang, A. A. Chmura, G. Zhu, J. H. Epstein, J. K. Mazet, B. Hu, W. Zhang, C. Peng, Y. J. Zhang, C. M. Luo, B. Tan, N. Wang, Y. Zhu, G. Cramer, S. Y. Zhang, L. F. Wang, P. Daszak and Z. L. Shi (2013). "Isolation and characterization of a bat SARS-like coronavirus that uses the ACE2 receptor." Nature **503**(7477): 535-538.
- Ghosh, A. and C. D. Lima (2010). "Enzymology of RNA cap synthesis." Wiley Interdiscip Rev RNA **1**(1): 152-172.

- Gorbalenya, A., S. Baker, R. S. Baric, R. J. de Groot, C. Drosten, A. Gulyaeva, B. Haagmans, C. Lauber, A. Leontovich, B. Neuman, D. Penzar, S. Perlman, L. L. M. Poon, S. Samborskiy, I. Sidorov, I. Sola and J. Ziebuhr (2020). "The species Severe acute respiratory syndrome-related coronavirus: classifying 2019-nCoV and naming it SARS-CoV-2." *Nat Microbiol* **5**(4): 536-544.
- Gouy, M., S. Guindon and O. Gascuel (2010). "SeaView version 4: A multiplatform graphical user interface for sequence alignment and phylogenetic tree building." *Mol Biol Evol* **27**(2): 221-224.
- He, R., A. Adonov, M. Traykova-Adonova, J. Cao, T. Cutts, E. Grudesky, Y. Deschambaul, J. Berry, M. Drebot and X. Li (2004). "Potent and selective inhibition of SARS coronavirus replication by aurointricarboxylic acid." *Biochem Biophys Res Commun* **320**(4): 1199-1203.
- Hecht, M., Y. Bromberg and B. Rost (2015). "Better prediction of functional effects for sequence variants." *BMC Genomics* **16 Suppl 8**: S1.
- Hu, B., L. P. Zeng, X. L. Yang, X. Y. Ge, W. Zhang, B. Li, J. Z. Xie, X. R. Shen, Y. Z. Zhang, N. Wang, D. S. Luo, X. S. Zheng, M. N. Wang, P. Daszak, L. F. Wang, J. Cui and Z. L. Shi (2017). "Discovery of a rich gene pool of bat SARS-related coronaviruses provides new insights into the origin of SARS coronavirus." *PLoS Pathog* **13**(11): e1006698.
- Ivanov, K. A. and J. Ziebuhr (2004). "Human coronavirus 229E nonstructural protein 13: characterization of duplex-unwinding, nucleoside triphosphatase, and RNA 5'-triphosphatase activities." *J Virol* **78**(14): 7833-7838.
- Jin, X., Y. Chen, Y. Sun, C. Zeng, Y. Wang, J. Tao, A. Wu, X. Yu, Z. Zhang, J. Tian and D. Guo (2013). "Characterization of the guanine-N7 methyltransferase activity of coronavirus nsp14 on nucleotide GTP." *Virus Res* **176**(1-2): 45-52.
- Jurrus, E., D. Engel, K. Star, K. Monson, J. Brandi, L. E. Felberg, D. H. Brookes, L. Wilson, J. Chen, K. Liles, M. Chun, P. Li, D. W. Gohara, T. Dolinsky, R. Konecny, D. R. Koes, J. E. Nielsen, T. Head-Gordon, W. Geng, R. Krasny, G. W. Wei, M. J. Holst, J. A. McCammon and N. A. Baker (2018). "Improvements to the APBS biomolecular solvation software suite." *Protein Sci* **27**(1): 112-128.
- Kindler, E. and V. Thiel (2014). "To sense or not to sense viral RNA--essentials of coronavirus innate immune evasion." *Curr Opin Microbiol* **20**: 69-75.
- Klein, S., M. Cortese, S. L. Winter, M. Wachsmuth-Melm, C. J. Neufeldt, B. Cerikan, M. L. Stanifer, S. Boulant, R. Bartenschlager and P. Chlanda (2020). "SARS-CoV-2 structure and replication characterized by in situ cryo-electron tomography." *Nat Commun* **11**(1): 5885.
- Knoops, K., M. Kikkert, S. H. Worm, J. C. Zevenhoven-Dobbe, Y. van der Meer, A. J. Koster, A. M. Mommaas and E. J. Snijder (2008). "SARS-coronavirus replication is supported by a reticulovesicular network of modified endoplasmic reticulum." *PLoS Biol* **6**(9): e226.
- Koonin, E. V. and B. Moss (2010). "Viruses know more than one way to don a cap." *Proc Natl Acad Sci U S A* **107**(8): 3283-3284.
- Lai, M. M. and S. A. Stohman (1981). "Comparative analysis of RNA genomes of mouse hepatitis viruses." *J Virol* **38**(2): 661-670.
- Laskowski, R. A. (1995). "SURFNET: a program for visualizing molecular surfaces, cavities, and intermolecular interactions." *J Mol Graph* **13**(5): 323-330, 307-328.
- Lehmann, K. C., A. Gulyaeva, J. C. Zevenhoven-Dobbe, G. M. Janssen, M. Ruben, H. S. Overkleeft, P. A. van Veelen, D. V. Samborskiy, A. A. Kravchenko, A. M. Leontovich, I. A. Sidorov, E. J. Snijder, C. C. Posthuma and A. E. Gorbalenya (2015). "Discovery of an essential nucleotidylating activity associated with a newly delineated conserved domain in the RNA polymerase-containing protein of all nidoviruses." *Nucleic Acids Res* **43**(17): 8416-8434.

- Ma, Y., L. Wu, N. Shaw, Y. Gao, J. Wang, Y. Sun, Z. Lou, L. Yan, R. Zhang and Z. Rao (2015). "Structural basis and functional analysis of the SARS coronavirus nsp14-nsp10 complex." Proc Natl Acad Sci U S A **112**(30): 9436-9441.
- Medvedev, K. E., L. N. Kinch and N. V. Grishin (2018). "Functional and evolutionary analysis of viral proteins containing a Rossmann-like fold." Protein Sci **27**(8): 1450-1463.
- Menachery, V. D., B. L. Yount, Jr., K. Debbink, S. Agnihothram, L. E. Gralinski, J. A. Plante, R. L. Graham, T. Scobey, X. Y. Ge, E. F. Donaldson, S. H. Randell, A. Lanzavecchia, W. A. Marasco, Z. L. Shi and R. S. Baric (2015). "A SARS-like cluster of circulating bat coronaviruses shows potential for human emergence." Nat Med **21**(12): 1508-1513.
- Moeller, N. H., K. Shi, Ö. Demir, S. Banerjee, L. Yin, C. Belica, C. Durfee, R. E. Amaro and H. Aihara (2021). "Structure and dynamics of SARS-CoV-2 proofreading exoribonuclease ExoN." bioRxiv: 2021.2004.2002.438274.
- Nakamura, T., K. D. Yamada, K. Tomii and K. Katoh (2018). "Parallelization of MAFFT for large-scale multiple sequence alignments." Bioinformatics **34**(14): 2490-2492.
- Nedialkova, D. D., A. E. Gorbalenya and E. J. Snijder (2010). "Arterivirus Nsp1 modulates the accumulation of minus-strand templates to control the relative abundance of viral mRNAs." PLoS Pathog **6**(2): e1000772.
- Ogando, N. S., F. Ferron, E. Decroly, B. Canard, C. C. Posthuma and E. J. Snijder (2019). "The curious case of the nidovirus exoribonuclease: its role in RNA synthesis and replication fidelity." Front Microbiol **10**: 1813.
- Ogando, N. S., J. C. Zevenhoven-Dobbe, Y. van der Meer, P. J. Bredenbeek, C. C. Posthuma and E. J. Snijder (2020). "The enzymatic activity of the nsp14 exoribonuclease is critical for replication of MERS-CoV and SARS-CoV-2." J Virol.
- Pearson, L. A., C. J. Green, Lin, A. P. Petit, D. W. Gray, V. H. Cowling and E. A. F. Fordyce (2021). "Development of a High-Throughput Screening Assay to Identify Inhibitors of the SARS-CoV-2 Guanine-N7-Methyltransferase Using RapidFire Mass Spectrometry." SLAS Discov: 24725552211000652.
- Pettersen, E. F., T. D. Goddard, C. C. Huang, G. S. Couch, D. M. Greenblatt, E. C. Meng and T. E. Ferrin (2004). "UCSF Chimera--a visualization system for exploratory research and analysis." J Comput Chem **25**(13): 1605-1612.
- Pfefferle, S., V. Krahling, V. Ditt, K. Grywna, E. Muhlberger and C. Drosten (2009). "Reverse genetic characterization of the natural genomic deletion in SARS-Coronavirus strain Frankfurt-1 open reading frame 7b reveals an attenuating function of the 7b protein in-vitro and in-vivo." Virology **6**: 131.
- Rabouw, H. H., M. A. Langereis, R. C. Knaap, T. J. Dalebout, J. Canton, I. Sola, L. Enjuanes, P. J. Bredenbeek, M. Kikkert, R. J. de Groot and F. J. van Kuppeveld (2016). "Middle East respiratory coronavirus accessory protein 4a inhibits PKR-mediated antiviral stress responses." PLoS Pathog **12**(10): e1005982.
- Ramanathan, A., G. B. Robb and S. H. Chan (2016). "mRNA capping: biological functions and applications." Nucleic Acids Res **44**(16): 7511-7526.
- Rao, S. T. and M. G. Rossmann (1973). "Comparison of super-secondary structures in proteins." J Mol Biol **76**(2): 241-256.
- Saberi, A., A. A. Gulyaeva, J. L. Brubacher, P. A. Newmark and A. E. Gorbalenya (2018). "A planarian nidovirus expands the limits of RNA genome size." PLoS Pathog **14**(11): e1007314.
- Saramago, M., C. Bárria, V. Costa, C. S. Souza, S. C. Viegas, S. Domingues, D. Lousa, C. M. Soares, C. M. Arraiano and R. G. Matos (2021). "New targets for drug design: Importance of nsp14/nsp10 complex formation for the 3'-5' exoribonucleolytic activity on SARS-CoV-2." bioRxiv: 2021.2001.2007.425745.

- Saramago, M., C. Barria, V. G. Costa, C. S. Souza, S. C. Viegas, S. Domingues, D. Lousa, C. M. Soares, C. M. Arraiano and R. G. Matos (2021). "New targets for drug design: Importance of nsp14/nsp10 complex formation for the 3'-5' exoribonucleolytic activity on SARS-CoV-2." *FEBS J.*
- Seybert, A., A. Hegyi, S. G. Siddell and J. Ziebuhr (2000). "The human coronavirus 229E superfamily 1 helicase has RNA and DNA duplex-unwinding activities with 5'-to-3' polarity." *RNA* **6**(7): 1056-1068.
- Seybert, A., C. C. Posthuma, L. C. van Dinten, E. J. Snijder, A. E. Gorbalenya and J. Ziebuhr (2005). "A complex zinc finger controls the enzymatic activities of nidovirus helicases." *J Virol* **79**(2): 696-704.
- Shannon, A., V. Fattorini, B. Sama, B. Selisko, M. Feracci, C. Falcou, P. Gauffre, P. E. Kazzi, E. Decroly, N. Rabah, K. Alvarez, C. Eydoux, J.-C. Guillemot, F. Debart, J.-J. Vasseur, M. Noel, A. Moussa, S. Good, K. Lin, J.-P. Sommadossi, Y. Zhu, X. Yan, H. Shi, F. Ferron and B. Canard (2021). "Protein-primed RNA synthesis in SARS-CoVs and structural basis for inhibition by AT-527." *bioRxiv*: 2021.2003.2023.436564.
- Shatkin, A. J. (1976). "Capping of eucaryotic mRNAs." *Cell* **9**(4 PT 2): 645-653.
- Smith, E. C., H. Blanc, M. C. Surdel, M. Vignuzzi and M. R. Denison (2013). "Coronaviruses lacking exoribonuclease activity are susceptible to lethal mutagenesis: evidence for proofreading and potential therapeutics." *PLoS Pathog* **9**(8): e1003565.
- Snijder, E. J., P. J. Bredenbeek, J. C. Dobbe, V. Thiel, J. Ziebuhr, L. L. Poon, Y. Guan, M. Rozanov, W. J. Spaan and A. E. Gorbalenya (2003). "Unique and conserved features of genome and proteome of SARS-coronavirus, an early split-off from the coronavirus group 2 lineage." *J Mol Biol* **331**(5): 991-1004.
- Snijder, E. J., E. Decroly and J. Ziebuhr (2016). "The Nonstructural Proteins Directing Coronavirus RNA Synthesis and Processing." *Adv Virus Res* **96**: 59-126.
- Snijder, E. J., R. Limpens, A. H. de Wilde, A. W. M. de Jong, J. C. Zevenhoven-Dobbe, H. J. Maier, F. Faas, A. J. Koster and M. Barcena (2020). "A unifying structural and functional model of the coronavirus replication organelle: Tracking down RNA synthesis." *PLoS Biol* **18**(6): e3000715.
- Sperry, S. M., L. Kazi, R. L. Graham, R. S. Baric, S. R. Weiss and M. R. Denison (2005). "Single-amino-acid substitutions in open reading frame (ORF) 1b-nsp14 and ORF 2a proteins of the coronavirus mouse hepatitis virus are attenuating in mice." *J Virol* **79**(6): 3391-3400.
- Sun, Y., Z. Wang, J. Tao, Y. Wang, A. Wu, Z. Yang, K. Wang, L. Shi, Y. Chen and D. Guo (2014). "Yeast-based assays for the high-throughput screening of inhibitors of coronavirus RNA cap guanine-N7-methyltransferase." *Antiviral Res* **104**: 156-164.
- Sutton, G., J. M. Grimes, D. I. Stuart and P. Roy (2007). "Bluetongue virus VP4 is an RNA-capping assembly line." *Nat Struct Mol Biol* **14**(5): 449-451.
- Tao, Y., D. L. Farsetta, M. L. Nibert and S. C. Harrison (2002). "RNA synthesis in a cage--structural studies of reovirus polymerase lambda3." *Cell* **111**(5): 733-745.
- Thao, T. T. N., F. Labroussaa, N. Ebert, P. V'Kovski, H. Stalder, J. Portmann, J. Kelly, S. Steiner, M. Holwerda, A. Kratzel, M. Gultom, K. Schmied, L. Laloli, L. Husser, M. Wider, S. Pfaender, D. Hirt, V. Cippa, S. Crespo-Pomar, S. Schroder, D. Muth, D. Niemeyer, V. Corman, M. A. Muller, C. Drosten, R. Dijkman, J. Jores and V. Thiel (2020). "Rapid reconstruction of SARS-CoV-2 using a synthetic genomics platform." *Nature*.
- Tischer, B. K., G. A. Smith and N. Osterrieder (2010). "En passant mutagenesis: a two step markerless red recombination system." *Methods Mol Biol* **634**: 421-430.
- van der Hoek, L. (2007). "Human coronaviruses: what do they cause?" *Antivir Ther* **12**(4 Pt B): 651-658.
- van Hemert, M. J., S. H. van den Worm, K. Knoops, A. M. Mommaas, A. E. Gorbalenya and E. J. Snijder (2008). "SARS-coronavirus replication/transcription complexes are membrane-protected and need a host factor for activity in vitro." *PLoS Pathog* **4**(5): e1000054.
- van Vliet, A. L., S. L. Smits, P. J. Rottier and R. J. de Groot (2002). "Discontinuous and non-discontinuous subgenomic RNA transcription in a nidovirus." *EMBO J* **21**(23): 6571-6580.



- Wang, Y., M. Grunewald and S. Perlman (2020). "Coronaviruses: An Updated Overview of Their Replication and Pathogenesis." Methods Mol Biol **2203**: 1-29.
- Wang, Y., Y. Sun, A. Wu, S. Xu, R. Pan, C. Zeng, X. Jin, X. Ge, Z. Shi, T. Ahola, Y. Chen and D. Guo (2015). "Coronavirus nsp10/nsp16 methyltransferase can be targeted by nsp10-derived peptide in vitro and in vivo to reduce replication and pathogenesis." J Virol **89**(16): 8416-8427.
- Weber, F., V. Wagner, S. B. Rasmussen, R. Hartmann and S. R. Paludan (2006). "Double-stranded RNA is produced by positive-strand RNA viruses and DNA viruses but not in detectable amounts by negative-strand RNA viruses." J Virol **80**(10): 5059-5064.
- Xie, L. and P. E. Bourne (2008). "Detecting evolutionary relationships across existing fold space, using sequence order-independent profile-profile alignments." Proc Natl Acad Sci U S A **105**(14): 5441-5446.
- Yan, L., J. Ge, L. Zheng, Y. Zhang, Y. Gao, T. Wang, Y. Huang, Y. Yang, S. Gao, M. Li, Z. Liu, H. Wang, Y. Li, Y. Chen, L. W. Guddat, Q. Wang, Z. Rao and Z. Lou (2020). "Cryo-EM Structure of an Extended SARS-CoV-2 Replication and Transcription Complex Reveals an Intermediate State in Cap Synthesis." Cell.
- Zhou, P., X. L. Yang, X. G. Wang, B. Hu, L. Zhang, W. Zhang, H. R. Si, Y. Zhu, B. Li, C. L. Huang, H. D. Chen, J. Chen, Y. Luo, H. Guo, R. D. Jiang, M. Q. Liu, Y. Chen, X. R. Shen, X. Wang, X. S. Zheng, K. Zhao, Q. J. Chen, F. Deng, L. L. Liu, B. Yan, F. X. Zhan, Y. Y. Wang, G. F. Xiao and Z. L. Shi (2020). "A pneumonia outbreak associated with a new coronavirus of probable bat origin." Nature **579**(7798): 270-273.
- Zuo, Y. and M. P. Deutscher (2001). "Exoribonuclease superfamilies: structural analysis and phylogenetic distribution." Nucleic Acids Res **29**(5): 1017-1026.
