1 Structure-function analysis of the nsp14 N7-guanine  
2 methyltransferase reveals an essential role in *Betacoronavirus*  
3 replication

4

5 Natacha S. Ogando<sup>1#</sup>, Priscila El Kazzi<sup>2#</sup>, Jessika C. Zevenhoven-Dobbe<sup>1</sup>, Brenda W. Bontes<sup>1</sup>,  
6 Alice Decombe<sup>2</sup>, Clara C. Posthuma<sup>1</sup>, Volker Thiel<sup>3,4</sup>, Bruno Canard<sup>2</sup>, François Ferron<sup>2,3#</sup>, Etienne  
7 Decroly<sup>2,£#</sup> & Eric J. Snijder<sup>1\*#</sup>

8 <sup>1</sup> Department of Medical Microbiology, Leiden University Medical Center, Leiden, The  
9 Netherlands, 2333ZA

10 <sup>2</sup> Architecture et Fonction des Macromolécules Biologiques, Centre National de la Recherche  
11 Scientifique, Aix-Marseille Université, Marseille, France, 13288

12 <sup>3</sup> European Virus Bioinformatics Center, Jena, Germany, 07743.

13 <sup>4</sup> Institute of Virology and Immunology (IVI), Bern, Switzerland, 3350.

14 <sup>5</sup> Department of Infectious Diseases and Pathobiology, Vetsuisse Faculty, University of Bern,  
15 Bern, Switzerland, 3012.

16 # Authors contributed equally

17 \* Eric J. Snijder; **Email:** [E.J.Snijder@lumc.nl](mailto:E.J.Snijder@lumc.nl)

18 £ Etienne Decroly; **Email:** [Etienne.decroly@univ-amu.fr](mailto:Etienne.decroly@univ-amu.fr)

19 **Author Contributions:** N.O., P.E.K., J.C.Z., B.B., A.D., and F.F. performed experimental work.  
20 N.O., P.E.K., F.F., J.C.Z., B.B., B.C., E.D., and E.J.S. analyzed the data and formulated research  
21 hypothesis. C.C.P., V.T., B.C., E.D., and E.J.S. supervised research and contributed in scientific  
22 discussions. N.O., P.E.K., F.F., E.D., and E.J.S. wrote the paper. All authors approved the  
23 version submitted.

24 **Competing Interest Statement:** All authors declare no competing interests.

25 **Classification:** Biological Sciences, Microbiology

26 **Keywords:** SARS-CoV, MERS-CoV, SARS-CoV-2, RNA synthesis, mRNA capping

27

## 28 **Abstract**

29 As coronaviruses (CoVs) replicate in the host cell cytoplasm, they rely on their own capping  
30 machinery to ensure the efficient translation of their mRNAs, protect them from degradation by  
31 cellular 5' exoribonucleases, and escape innate immune sensing. The CoV nonstructural protein  
32 14 (nsp14) is a bi-functional replicase subunit harboring an N-terminal 3'-to-5' exoribonuclease  
33 (ExoN) domain and a C-terminal (N7-guanine)-methyltransferase (N7-MTase) domain that is  
34 presumably involved in viral mRNA capping. Here, we aimed to integrate structural, biochemical,  
35 and virological data to assess the importance of conserved N7-MTase residues for nsp14's  
36 enzymatic activities and virus viability. We revisited the crystal structure of severe acute respiratory  
37 syndrome (SARS)-CoV nsp14 to perform an *in silico* comparative analysis between  
38 betacoronaviruses. We identified several residues likely involved in the formation of the N7-MTase  
39 catalytic pocket, which presents a fold distinct from the Rossmann fold observed in most known  
40 MTases. Next, for SARS-CoV and Middle East respiratory syndrome-CoV, site-directed  
41 mutagenesis of selected residues was used to assess their importance for *in vitro* enzymatic  
42 activity. Most of the engineered mutations abolished N7-MTase activity, while not affecting nsp14-  
43 ExoN activity. Upon reverse engineering of these mutations into different betacoronavirus  
44 genomes, we identified two substitutions (R310A and F426A in SARS-CoV nsp14) abrogating virus  
45 viability and one mutation (H424A) yielding a crippled phenotype across all viruses tested. Our  
46 results identify the N7-MTase as a critical enzyme for betacoronavirus replication and define key  
47 residues of its catalytic pocket that can be targeted to design inhibitors with a potential *pan*-  
48 coronaviral activity spectrum.

## 49 **Significance Statement**

50 The ongoing SARS-CoV-2 pandemic emphasizes the urgent need to develop efficient broad-  
51 spectrum anti-CoV drugs. The structure-function characterization of conserved CoV replicative  
52 enzymes is key to identifying the most suitable drug targets. Using a multidisciplinary comparative  
53 approach and different betacoronaviruses, we characterized the key conserved residues of the  
54 nsp14 (N7-guanine)-methyltransferase, a poorly defined subunit of the CoV mRNA-synthesizing  
55 machinery. Our study highlights the unique structural features of this enzyme and establishes its  
56 essential role in betacoronavirus replication, while identifying two residues that are critical for the  
57 replication of the four betacoronaviruses tested, including SARS-CoV-2.

58  
59  
60

61 **Main Text**

62

63 **Introduction**

64

65 At their 5' end, all eukaryotic mRNAs carry an N7-methylguanosine cap that ensures their  
66 translation by mediating mRNA recognition during the formation of the ribosomal pre-initiation  
67 complex. The co-transcriptional capping of cellular pre-mRNAs occurs in the nucleus and is also  
68 critical for pre-mRNA splicing and nuclear export (reviewed in (1-3)). The mRNA cap consists of an  
69 N7-methylated 5' guanosine moiety that is linked to the first nucleotide of the transcript by a 5'-5'  
70 triphosphate bridge (4). Its synthesis requires (presumably) the consecutive involvement of  
71 triphosphatase, guanylyltransferase, and guanine-N7 methyltransferase activities to produce a  
72 cap-0 structure. The first nucleotides of mammalian mRNAs are then methylated on the 2'OH  
73 position to yield a cap-1 structure that identifies the transcript as "self" and prevents activation of  
74 innate immune sensors (reviewed in (2, 5)). Furthermore, the cap structure promotes mRNA  
75 stability by providing protection from cellular 5' exoribonucleases.

76 Viruses rely on host ribosomes for their gene expression and have adopted different  
77 strategies to ensure translation of their own mRNAs. These include using the canonical nuclear  
78 capping pathway, so-called 'cap-snatching' mechanisms, and replacement of the cap by a  
79 ribosome-recruiting RNA structure (reviewed in (2, 6, 7)). Various cytosolically replicating virus  
80 families have evolved their own capping machinery. The latter applies to the coronavirus (CoV)  
81 family, which includes the severe acute respiratory syndrome coronavirus 2 (SARS-CoV-2), the  
82 causative agent of COVID-19 (8, 9), and a range of other CoVs infecting human or animal hosts  
83 (10, 11). This century alone, the CoV family has given rise to three major zoonotic introductions:  
84 SARS-CoV-2, the Middle East respiratory syndrome-CoV (MERS-CoV) discovered in 2012, and  
85 SARS-CoV, emerging in South East Asia in 2002. All three belong to the genus *Betacoronavirus*,  
86 which is abundantly represented among CoVs circulating in bat species (12-15). Despite their  
87 demonstrated potential to cross species barriers, prophylactic and therapeutic solutions for CoV  
88 infections to prevent or rapidly contain the current COVID-19 pandemic were not available.

89 The positive-sense CoV genome is unusually large (~30 kb) and its 5' proximal two-thirds  
90 encodes for two replicase polyproteins that are post-translationally cleaved into 16 nonstructural  
91 proteins (nsp) (16, 17). The CoV replicative enzymes, including the nsp12 RNA-dependent RNA  
92 polymerase (RdRp), assemble into a protein complex that is embedded within virus-induced  
93 replication organelles (18-20) and directs the synthesis and capping of newly made viral genomes  
94 as well as subgenomic mRNAs that serve to express additional CoV genes. Capping is thought to  
95 involve the successive action of multiple CoV enzymes: (i) the nsp13 RNA triphosphatase removing  
96 the  $\gamma$  phosphate from the nascent 5'-triphosphorylated RNA (21, 22); (ii) an RNA  
97 guanylyltransferase (GTase) producing a GpppN cap by transferring guanosine monophosphate  
98 (GMP) to the RNA's dephosphorylated 5' end, a role recently attributed to the nsp12  
99 nucleotidyltransferase (NiRAN) domain, but remaining to be confirmed (23-25); (iii) the nsp14 (N7-  
100 guanine)-methyltransferase (N7-MTase) methylating the N7 position of the cap while using S-  
101 adenosyl methionine (SAM) as methyl donor; (iv) the nsp16 ribose 2'-O-methyltransferase (2'-O-  
102 MTase) converting the cap-0 into a cap-1 structure ( $7^m\text{GpppN}_2\text{Om}$ ; (26, 27)) by performing additional  
103 methylation with the assistance of nsp10 as co-factor (26, 28, 29).

104 Over the past 15 years, the CoV capping machinery has mainly been analyzed *in vitro*, in  
105 particular for SARS-CoV, but its characterization in the context of the viral replication cycle has  
106 remained limited to a handful of studies. This applies in particular to the CoV N7-MTase domain,  
107 expressed as part of the ~60-kDa nsp14, a bi-functional replicase subunit also containing an N-  
108 terminal 3'-to-5' exoribonuclease domain implicated in promoting the fidelity of CoV replication (30,  
109 31). Following the discovery of an N7-MTase activity associated with nsp14's C-terminal domain  
110 (27), the protein was found to methylate non-methylated cap analogues or guanosine triphosphate  
111 (GTP) substrates in the presence of SAM in biochemical assays (26, 32, 33). While the association  
112 of nsp10 with nsp14 enhances its ExoN activity, the *in vitro* N7-MTase activity does not depend on  
113 nsp10 co-factor (26, 34). Biochemical and structural characterization of the N7-MTase and ExoN  
114 domains demonstrated that the two domains are functionally distinct (35-38). Nevertheless,  
115 truncations and alanine substitutions in the ExoN domain can severely affect SAM binding and N7-

116 MTase activity (27, 33). The notion that the two enzymatic domains are structurally intertwined was  
117 also supported by the SARS-CoV nsp14 crystal structure (35, 36) which was found to be composed  
118 of (i) a flexible N-terminal sub-domain forming the nsp10 binding site (aa 1-58), (ii) the 3'-to-5'  
119 exoribonuclease (ExoN) domain (aa 1-291), (iii) a flexible hinge region consisting of a loop that  
120 connects the N- and C-terminal domains, and three strands protruding from the C-terminal domain  
121 (aa 285-300 and aa 407-430), and (iv) the C-terminal N7-MTase domain (aa 292-527) ((35, 36);  
122 Fig. 1A).

123 Interestingly, the structural analysis of the SARS-CoV-nsp14 N7-MTase revealed a non-  
124 Rossmann fold (36), distinguishing this enzyme from commonly known cellular and viral  
125 methyltransferases (39, 40). Despite the biochemical characterization of the CoV N7-MTase, the  
126 assessment of its importance for virus replication has remained limited to studies with a few point  
127 mutations introduced into nsp14 of murine hepatitis virus, a model betacoronavirus (41-44). These  
128 studies highlighted two motifs important for CoV replication: (i) the presumed SAM binding motif I  
129 (DxGxPxG/A, with x being any amino acid; Fig. 2C, motif III), first discovered by superimposition of  
130 a SARS-CoV nsp14 N7-MTase structure model with the crystal structures of cellular N7-MTases  
131 (27); (ii) nsp14 residues 420-428 (Fig. 2C, part of motif VI) that, based on the SARS-CoV crystal  
132 structure, seem to form a constricted pocket holding the cap's GTP moiety (35). Comparative  
133 analysis of N7-MTase domains revealed that a number of residues crucial for substrate and ligand  
134 binding are conserved among homologous enzymes in more distant CoV (Fig. 2A) and other  
135 nidoviruses (45-47).

136 Due to its conservation and unique structural features, the CoV N7-MTase constitutes an  
137 attractive target for antiviral drug development (48-50), to combat SARS-CoV-2 or future emerging  
138 CoV threats. Only a few compounds have been reported to inhibit nsp14 N7-MTase activity *in vitro*  
139 (26, 32, 48-50). Evaluation of their antiviral activity revealed limited inhibition of CoV replication in  
140 cell culture, suggesting poor bio-availability and/or specificity (48, 51). Structural, biochemical, and  
141 virological studies of CoV N7-MTase structure and function have not been integrated thus far. Here,  
142 we set out to define the catalytic pocket, characterize its involvement in enzymatic activity, and use  
143 these observations to probe the enzyme's importance for CoV replication. Using four different  
144 betacoronaviruses (SARS-CoV, MERS-CoV, MHV, and SARS-CoV-2), we identified conserved  
145 features and residues supporting N7-MTase activity and viral replication, thus providing a solid  
146 framework for future efforts to design broad-spectrum inhibitors of this critical CoV enzyme.  
147

148

149

## 149 Results

150

151 **Identification of key residues for RNA and SAM binding by the CoV N7-MTase.** The previously  
152 resolved SARS-CoV nsp14 structure (35, 36) revealed how the ExoN and N7-MTase domains are  
153 structurally interconnected, with possible functional implications (Fig. 1). Thus far, a structure of  
154 nsp14 in complex with 5'-capped RNA is lacking. Due to some structural peculiarities, it was unclear  
155 which conserved residues may be mechanistically involved in N7-methylation and how important  
156 these may be for overall CoV replication. Therefore, we first revisited the core structure of the  
157 SARS-CoV N7-MTase, to guide a subsequent biochemical and virological comparison across  
158 multiple betacoronaviruses.

159 In the SARS-CoV nsp14 structure (35), the ExoN core presents a fold characteristic of the  
160 DED/EDh family of exonucleases (31, 52, 53). However, the N7-MTase domain does not exhibit  
161 the canonical 'Rossmann fold' that is common among RNA virus MTases, RNA cap-0 MTases at  
162 large, and all five classes of SAM-dependent MTases (54, 55). A hinge region that is highly  
163 conserved across CoVs is present at the interface of nsp14's ExoN and N7-MTase domains (Fig.  
164 1A) and constitutes a unique structural feature of this bi-functional CoV protein. It not only connects  
165 the two domains, but also forms an extension that protrudes from the surface of the N7-MTase  
166 domain (Fig. 1B). Although, the overall structure suggests ExoN and N7-MTase to be separate  
167 domains, the successful expression and purification of truncated forms of the N7-MTase domain,  
168 with or without the hinge sub-domain, has not been reported (27, 56). This might be related to the  
169 hydrophobic nature of the hinge, which is likely important for protein stability and folding. Several  
170 studies reported that the replacement of ExoN catalytic residues does not impair the N7-MTase

171 activity, suggesting that the functional interplay between the two domains is limited (26, 27, 33, 37,  
172 38, 48). Whereas the hinge region allows lateral and rotational movement of the two nsp14  
173 domains, one side of the hinge also constitutes the ‘ceiling’ of the N7-MTase active site (Fig. 1B).

174 The structures of SARS-CoV nsp14 in complex with SAM and GpppA (PDB: 5C8S and  
175 5C8T; (35)) have defined the enzyme’s cap-binding pocket. However, the crystal packing  
176 profoundly constrained the structural characterization of the N7-MTase domain and the overall low  
177 resolution left uncertainties regarding the positioning of the RNA ligand. Therefore, we performed  
178 a thorough structural analysis of the enzyme’s cavity, supported by CoV-wide nsp14 sequence  
179 comparisons, in order to define conserved N7-MTase residues that may be involved in enzymatic  
180 activity (Fig. S2). Several aspects were taken into consideration while delimiting the SAM and RNA  
181 binding sites: the general geometry of the cavity, its electrostatic properties, and the conservation  
182 of specific amino acid residues. We used Surfnet software (57) to define the volume corresponding  
183 to the ligand-binding cavity (Fig. 1C). This volume is shaped as a dual bulb, with the larger pocket  
184 accommodating the capped RNA and the smaller one forming the SAM binding site. An  
185 electrostatic surface analysis shows positive charges lining the wall of the putative RNA-binding  
186 cavity (Fig. 1D and Fig. S1), which would be consistent with its function. Likewise, positive charges  
187 that might accommodate the carbocyclic part of the methyl donor were identified in the SAM binding  
188 pocket (Fig. 1D). Additionally, conserved hydrophobic residues (Motif I; Fig. 2C) were mapped to a  
189 deep hydrophobic cavity, supposedly accommodating the SAM base by a stacking interaction with  
190 F426 (SARS-CoV numbering). Finally, the integration of the structural models with CoV-wide N7-  
191 MTase sequence comparisons (Table S1 and Fig. S2) allowed the identification of conserved  
192 potential key residues within each cavity (blue regions in Fig. 2A). Based on their conservation and  
193 positioning, six conserved motifs (I-VI) were defined, each containing a series of specific charged  
194 or aromatic residues that have their side chain pointing toward the cavity (Fig. 2B and 2C). Their  
195 features suggested they can facilitate the methyl transfer from SAM onto the cap’s guanine residue  
196 at the 5' end of the RNA substrate, by stabilizing and/or correctly positioning the cap structure. The  
197 following potential key residues were identified (amino acid numbers matching those in SARS-CoV  
198 nsp14): Motif I, W292; Motif II, N306 and R310; Motif III, D331 and K336; Motif IV, D352; Motif V,  
199 N386; Motif VI, Y420, N422, H424, and F426 (Fig. 2B and 2C). To assess the possible impact of  
200 their replacement on nsp14 folding, we analyzed the predicted impact of single-site substitutions  
201 with alanine on the thermostability of SARS-CoV nsp14 (Table S2 and Fig. 5A). Except for R310,  
202 all replacements yielded positive  $\Delta\Delta G$  values, suggesting that these mutations may affect MTase  
203 stability by altering either its fold, or the cavity for SAM or RNA binding (Table S2 and Fig. 5A).  
204 Noticeably, mutations in Motifs I and VI, which are spatially close as part of the hinge and most  
205 likely involved in the binding of capped RNA, resulted in the largest  $\Delta\Delta G$  gains. Similar observations  
206 were made when the impact of substitutions with other amino acids was evaluated for other  
207 betacoronaviruses (Table S3).

208

209 **Identification of residues crucial for *in vitro* N7-MTase activity.** To experimentally verify the  
210 outcome of our structural analysis (Fig. 1-2), we probed the functional importance of selected  
211 residues through targeted mutagenesis and *in vitro* N7-MTase assays. Based on their  
212 conservation, charge, position, and potential role for RNA or SAM binding in the catalytic pocket  
213 (Fig. 2B and 2C), eleven and nine N7-MTase residues were replaced with alanine in recombinant  
214 SARS-CoV and MERS-CoV nsp14, respectively. N-terminally H-tagged proteins were expressed  
215 in *E. coli* and purified using immobilized metal affinity chromatography (IMAC) followed by size  
216 exclusion chromatography (Fig. 3A and 3B).

217 We evaluated the N7-MTase activity of nsp14 mutants in an assay using a GpppACCCC  
218 capped RNA substrate and radiolabeled [<sup>3</sup>H]SAM. The transfer of the [<sup>3</sup>H]methyl group onto the  
219 RNA substrate was quantified using filter binding assays (Fig. 3C and 3D), as described previously  
220 (26, 34), and compared to the enzymatic activity of wild-type SARS-CoV or MERS-CoV nsp14.  
221 With the exception of N306A (30% residual activity), N422A (53% residual activity), and H424A  
222 (40% remaining), all SARS-CoV mutations tested almost completely abrogated nsp14 N7-MTase  
223 activity (Fig. 3C). In the case of MERS-CoV nsp14, only mutants N418A and F422A retained partial  
224 N7-MTase activity, 34% and 70%, respectively, while again all other mutations rendered the  
225 enzymatic activity barely detectable (Fig. 3D). In terms of residual activity, differences were



226 observed for some pairs of equivalent SARS-CoV and MERS-CoV mutants (e.g. the H and F in  
227 motif VI), but overall the results were fully in line with the outcome of our structural analysis. Thus,  
228 our data confirmed and extended a previous study (35), and showed that N7-MTase activity is  
229 affected by mutations that either may inhibit SAM binding (W292A, D331A, G333A, K336A, D352A  
230 in SARS-CoV) or likely interfere with RNA chain stabilization (N306A, R310A, Y420A, N422A,  
231 F426A) in the catalytic pocket.

232  
233 **Revisiting the interplay between the N7-MTase and ExoN domains of nsp14.** Despite the  
234 notion that the ExoN and N7-MTase domains of CoV nsp14 may be functionally independent (27,  
235 33, 35, 36), they are structurally interconnected by the hinge region (Fig. 1). Therefore, we  
236 evaluated the impact of all of our N7-MTase mutations on ExoN functionality, using an *in vitro* assay  
237 with 5'-radiolabeled RNA substrate H4 (34), a 22-nt RNA of which the largest part folds into a  
238 hairpin structure. Its degradation was monitored using denaturing polyacrylamide gel  
239 electrophoresis and autoradiography (Fig. 4). Nsp10 was added as a co-factor that importantly  
240 stimulates nsp14 ExoN activity (34, 35, 37), as again confirmed in the 'nsp14 only' control assay  
241 (Fig. 4). As expected, in time course experiments, we observed the progressive 3'-to-5' degradation  
242 of the RNA substrate by the wild-type nsp10-nsp14 pair of both SARS-CoV (Fig. 4A) and MERS-  
243 CoV (Fig. 4B). In the same assay, most of our N7-MTase mutations barely affected ExoN activity  
244 (Fig. 4A and 4B), also supporting the notion that these mutant proteins had folded correctly. In  
245 contrast, the ExoN activity of SARS-CoV mutants R310A, Y420A and H424A, and MERS-CoV  
246 mutant W292A was strongly or partially affected, as indicated by the reduced amount of hydrolysis  
247 products at the bottom of the gel. Meanwhile, incorporation of the H420A mutation completely  
248 abrogated MERS-CoV nsp14 ExoN activity. Three of the five mutations (Y420A and H424A in  
249 SARS-CoV and H420A in MERS-CoV) that affected ExoN activity mapped to motif VI in the hinge  
250 region (Fig. 2). Based on the structural analysis, we assume that these mutations affect either the  
251 overall nsp14 folding or – more likely - constrain the flexibility of the hinge subdomain with negative  
252 consequences for ExoN functionality (35, 36). Conversely, a MERS-CoV ExoN knockout mutant  
253 (D90A/E92A), which was included as a control, was found to modestly impact N7-MTase activity  
254 (Fig. 3D). Taken together, our data suggest that, although the N7-MTase sequence is well  
255 conserved among betacoronaviruses ((35, 37) and Fig. S2), the differences observed between  
256 SARS-CoV and MERS-CoV must be caused by a certain level of structural variability or differences  
257 in recombinant protein stability.

258  
259 **The nsp14 N7-MTase is critical for SARS-CoV viability.** As summarized above, most prior  
260 biochemical and structural studies of the CoV N7-MTase were performed using SARS-CoV nsp14,  
261 whereas mutagenesis in the context of virus replication (using reverse genetics) was restricted to  
262 MHV studies in which, for different reasons, the conserved D and G residues in motif III and the Y  
263 residue in motif VI were targeted (41, 43, 58). To establish a connection between the biochemical  
264 and virological data on the N7-MTase, we first introduced twelve single N7-MTase mutations into  
265 the SARS-CoV genome, using a bacterial artificial chromosome-based reverse genetics system.  
266 Each mutant was engineered in duplicate and launched by *in vitro* transcribing full-length RNA that  
267 was electroporated into BHK-21 cells. To propagate viral progeny, if released, transfected BHK-21  
268 cells were mixed with Vero E6 cells and incubated up to 6 days. Each mutant was launched at least  
269 four times, using RNA from 2 independent clones in two independent experiments, and mutant  
270 phenotypes are summarized in Fig. 5A.

271 In line with the biochemical data, the non-viable phenotype of six of the twelve SARS-CoV  
272 mutants (Fig. 5B) provided clear support for the importance of key residues in N7-MTase motifs II  
273 (R310), III (D331 and G333), V (N386), and VI (Y420 and F426). As anticipated, mutations in the  
274 canonical SAM binding motif III (DxGxPxG/A) completely abrogated SARS-CoV replication (Fig.  
275 5A), apparently confirming the critical role of D331, which was postulated to be a key residue for  
276 methylation upon the discovery of the CoV N7-MTase (27). On the other hand, D331A was the only  
277 non-viable SARS-CoV mutant for which reversion to wild-type was occasionally observed,

278 suggesting that a very low level of viral RNA synthesis remained possible in spite of this mutation  
279 (see also below).

280 Remarkably, SARS-CoV mutations N306A, K336A, and N422A in motifs II, III, and VI,  
281 respectively, were found to yield viruses with plaque phenotypes and progeny titers similar to those  
282 of the wild-type control (Fig. 5), despite the major impact of these mutations on *in vitro* N7-MTase  
283 activity (Fig. 3C). Likewise, the viable but severely crippled (small-plaque) virus phenotypes of  
284 motif-I mutant W292A and motif VI-mutant H424A were surprising (Fig. 5B), although for the latter  
285 the biochemical assays did reveal some activity when performed with an increased enzyme  
286 concentration (Fig. 3C and (35)). Interestingly, mutant D352A yielded a mixed-size plaque  
287 phenotype, suggesting rapid (pseudo)reversion in a minor fraction of this mutant's progeny (Fig.  
288 5B). For all six viable mutants, the presence of the original mutation in the viral progeny was  
289 confirmed by sequence analysis of the full-length nsp14-coding region of the viral genome. No  
290 other mutations were detected in this region of the genome. For non-viable mutants, transfected  
291 cells were incubated and monitored for 6 days and absence of viral activity was also confirmed by  
292 immunofluorescence microscopy with antibodies specific for double-stranded RNA and SARS-CoV  
293 nsp4.

294 In general, our data demonstrated the importance of the N7-MTase domain for SARS-CoV  
295 viability and confirmed the importance of the motifs and key residues identified using structural  
296 biology and biochemical approaches (summary presented in Fig. 5A). Nevertheless, for several  
297 mutants the data from different types of assays did not readily align, which prompted us to expand  
298 the reverse genetics efforts to other betacoronaviruses.

299  
300 **Phenotypic differences between betacoronaviruses N7-MTase mutants suggest complex**  
301 **structure-function relationships.** Even when targeting highly conserved viral functions, the  
302 introduction of equivalent mutations in closely related viruses can sometimes yield remarkably  
303 different mutant phenotypes. A recent example is the inactivation of the nsp14 ExoN, which is  
304 tolerated by MHV and SARS-CoV, but not by MERS-CoV and SARS-CoV-2, the latter virus having  
305 an nsp14 sequence that is 95% identical to that of SARS-CoV (37). To expand our understanding  
306 of the impact of N7-MTase mutagenesis, we engineered, launched, and analyzed a set of MERS-  
307 CoV and MHV mutants, using technical procedures similar to those described above for SARS-  
308 CoV (see Methods). In this case, the production of viable progeny was facilitated by co-culturing  
309 transfected BHK-21 cells with host cells appropriate for the amplification of MHV (17clone1 cells)  
310 or MERS-CoV (Huh7 cells). Again, each mutant was launched at least four times (from duplicate  
311 full-length cDNA clones) and the results are summarized in Fig. 5.

312 The mutations tested for MERS-CoV and MHV had a large predicted impact in our folding  
313 free energy analysis (Table S2 and Table S3) and/or yielded a non-viable or crippled phenotype in  
314 our SARS-CoV study (Fig. 5A). We evaluated whether these residues were equally critical for the  
315 replication of other betacoronaviruses. For clarity, in the text below we will refer to the conserved  
316 key residues of each motif instead of using nsp14 amino acid numbers, which are slightly different  
317 when comparing SARS-CoV, MERS-CoV and MHV (see Fig. 5A).

318 In contrast to the SARS-CoV result, the replacement of the W in SAM binding site motif I  
319 was lethal for both MERS-CoV and MHV. Strikingly, mutagenesis of the D and G in motif III (SAM  
320 binding site) yielded the opposite outcome: both were not tolerated in SARS-CoV, but resulted in  
321 crippled but viable or even wild type-like phenotypes for MERS-CoV and MHV, respectively (Fig.  
322 5B). These results again indicated that CoV N7-MTase active site mutants can be (partially) viable,  
323 even in the absence of detectable *in vitro* enzymatic activity (Fig. 3D). Similar to our observations  
324 for SARS-CoV, the replacement of the D in motif IV and the N in motif VI had moderate or no  
325 impact, respectively, on the production of MERS-CoV progeny (Fig. 5). Replacement of the  
326 conserved H in motif VI (RNA binding site) consistently crippled replication across SARS-CoV,  
327 MERS-CoV, and MHV (Fig. 5B), while replacement of the conserved Y in the same motif was  
328 partially tolerated by MERS-CoV, but not by SARS-CoV and MHV.

329 Our betacoronavirus comparison identified only two N7-MTase mutations that consistently  
330 abrogated the replication of all three viruses tested: the R-to-A in motif II and the F-to-A in Motif VI,  
331 which both map to the putative RNA binding site. This was surprising in the case of MERS-CoV,  
332 given the fact that this mutation (F422A in MERS-CoV) allowed substantial N7-MTase activity in

333 the *in vitro* assay (Fig. 3D). When SARS-CoV-2 emerged during the course of this study, the three  
334 mutations that produced a similar phenotype across SARS-CoV, MERS-CoV and MHV (R310A,  
335 H424A, and F426A; using SARS-CoV numbering) were also engineered for this newly discovered  
336 coronavirus. Again, the R310A and F426A replacements were found to fully abrogate virus  
337 replication, while H424A yielded a crippled phenotype in SARS-CoV-2 (Fig. 5).

338  
339

## 340 Discussion

341

342 Most viral MTases belong to the Rossmann-fold family (55, 59), a ubiquitous higher-order structure  
343 among dinucleotide-binding enzymes (55, 60). The CoV nsp14 N7-MTase was the first identified  
344 example of a non-Rossmann fold viral MTase (35, 36, 45), and the only one thus far for which some  
345 structural and functional information had been gathered. While some viral N7-MTase crystal  
346 structures have been resolved (35, 36, 61-63), their biochemical properties and signature  
347 sequences critical for RNA binding or enzymatic activity remain poorly defined compared to *e.g.*  
348 the 2'-O-MTases, an example of which is found in CoV nsp16 (reviewed in(6)). Likewise, the  
349 biological role and relevance of the CoV N7-MTase have not been explored in much detail. In recent  
350 studies and reviews, often related to SARS-CoV-2, the enzyme is widely assumed to secure the  
351 translation of CoV subgenomic mRNAs and genome, which obviously is a critical step for any  
352 positive-stranded RNA virus. However, direct biochemical evidence showing that CoV mRNAs  
353 indeed carry an N7-methylated cap at their 5' end is still lacking. The presence of such a cap on  
354 CoV RNAs was first postulated following RNase T1 and T2 digestion studies with <sup>32</sup>P-labeled MHV  
355 RNA, 40 years ago (64). Additional support came from immunoprecipitation experiments using a  
356 cap-specific monoclonal antibody (recognizing both the rare nucleoside 2,2,7-trimethylguanosine  
357 and 7-methylguanosine (m7G) cap structures ) that brought down the mRNAs of equine torovirus  
358 (65), a distant CoV relative for which – perhaps strikingly – an N7-MTase domain still remains to  
359 be identified(45). The presence of enzymes required for capping in CoVs and many of their relatives  
360 (6, 17, 45, 47, 66) and the *in vitro* activity profile of recombinant CoV nsp14 (26, 27, 32, 33, 37, 38)  
361 lend additional credibility to CoV capping and cap methylation, but do not exclude the possibility  
362 that the CoV N7-MTase may target other substrates as well.

363 To enhance our overall understanding of nsp14 N7-MTase structure and function, also in  
364 the light of its emergence as an important drug target in the battle against SARS-CoV-2 (50, 67-  
365 69), we now revisited the SARS-CoV nsp14 X-ray structure to define the most likely residues  
366 involved in N7-MTase substrate binding and catalysis. Instead of a  $\beta\alpha\beta$  architecture (a seven-  
367 stranded  $\beta$ -sheet surrounded by six  $\alpha$ -helices) and the canonical MTase motifs, the CoV N7-MTase  
368 incorporates twelve  $\beta$ -strands and five  $\alpha$ -helices that form a five-stranded  $\beta$ -sheet core (36, 45).  
369 The overall nsp14 structure reveals two domains interconnected by a hinge that may confer the  
370 flexibility needed to orchestrate the different functions of the protein during CoV replication (36).  
371 Furthermore, the protein binds to nsp10, a critical co-factor for nsp14's ExoN activity (34, 70). The  
372 conversion of a 5'-terminal GMP cap (GpppN) into a cap-0 structure (<sup>7m</sup>GpppN) involves multiple  
373 steps: stabilization of the RNA chain, SAM binding, methyl transfer to the N7 position of the cap,  
374 release of the methylated RNA substrate, and SAH release. Our structural analysis identified  
375 several residues with their side chains pointing towards the catalytic pocket, which could be  
376 classified as likely RNA- or SAM-binding motifs (Fig. 2B and 2C). Taking into account the amino  
377 acid sequence conservation between MHV, SARS-CoV, SARS-CoV-2, and MERS-CoV (Fig. 2A  
378 and alignment in Fig. S2), and the structures available to date (35, 36, 71, 72), we surmised these  
379 CoV N7-MTases to have an overall similar fold and structural organization. The impact of alanine  
380 substitutions of selected key residues in these motifs was then evaluated both *in vitro*, using SARS-  
381 CoV or MERS-CoV recombinant nsp14, and in the context of the viral replication cycle, by  
382 engineering the corresponding virus mutants in different betacoronaviruses.

383 Although the biochemical and virological data presented in this study clearly provide  
384 support for the predictions derived from our structural analysis, the overall interpretation of the data  
385 set undeniably is much more complex than anticipated (Fig. 5A). Replacement of conserved SARS-  
386 CoV and MERS-CoV N7-MTase residues largely or completely abrogated enzymatic activity *in vitro*  
387 (Fig. 3C and 3D), supporting their identification as key residues for the enzyme's functionality when



388 the protein is expressed alone (N7-MTase activity) or when tested in complex with nsp10 (ExoN  
389 activity). However, for several SARS-CoV and MERS-CoV mutations the data on enzymatic activity  
390 *in vitro* and virus mutant viability appeared to be at odds with each other (Fig. 5A). One possible  
391 interpretation is that (very) low levels of N7-MTase activity may still suffice to support viral  
392 replication in cell culture models. Alternatively, the *in vitro* N7-MTase assays may have suffered  
393 from technical complications, such as suboptimal or incorrect (mutant) N7-MTase domain folding.  
394 This could be different for nsp14 expressed in the context of the virus-infected cell and in the  
395 presence of its natural interaction partners, in particular other members of the viral replication and  
396 transcription complex. It is conceivable that the impact of nsp14 mutations on the fold and/or critical  
397 protein-protein or protein-RNA interactions of the N7-MTase domain could fluctuate between  
398 different assay systems. This might explain a stronger (e.g., MERS-CoV mutant F422A) or less  
399 dramatic effect in the virus-infected cell compared to what is observed in enzymatic assays (Fig.  
400 5A). Mutations mapping to motif VI (hinge region) yielded inconsistent results in comparison to prior  
401 *in vitro* studies (26, 27, 32-35), which might be attributed (in part) to different *in vitro* assay  
402 conditions. Such technical explanations, however, do not apply when introducing equivalent  
403 substitutions in different betacoronaviruses and evaluating them in the context of the viral  
404 replication cycle. Also here apparent inconsistencies were observed in terms of the variable impact  
405 of certain mutations on the overall replication of virus mutants. The results obtained with mutations  
406 in motif III (the presumed SAM binding motif DxGxPxG/A) were a striking example: the viral  
407 phenotype for the D-to-A mutant (D331A in SARS-CoV and MERS-CoV, D330A in MHV) ranged  
408 from non-viable for SARS-CoV, via severely crippled for MERS-CoV to wild type-like for MHV (Fig.  
409 5). SARS-CoV residue D331 was first identified as important for N7-MTase activity by the  
410 superimposition of nsp14 with cellular N7-MTase structures (27). However, a previous MHV study  
411 (43) had already documented that replacement of the corresponding residue D330 did not affect  
412 MHV replication, and pointed to G332 as a more important residue in motif III, which was confirmed  
413 in this study (Fig. 5). These results are consistent with the SARS-CoV nsp14 crystal structure  
414 showing that residue G333 in the DxG motif (G332 in MHV) is in direct contact with the SAM methyl  
415 donor (35), although apparently its replacement is not sufficient to render all betacoronaviruses  
416 non-viable. These results stress the importance to achieve a series of high-resolution structures of  
417 these different proteins in order to determine the subtle mechanistic differences.

418 The only other N7-MTase position probed by reverse genetics so far was the conserved  
419 tyrosine in motif VI (Fig. 2C; Y414 in MHV). This residue attracted attention by the intriguing  
420 serendipitous finding that its replacement with histidine did not affect replication of MHV strain A59  
421 in cell culture, but strongly reduced replication and virulence in mice (41). Also, an Y414A  
422 substitution was tolerated in MHV-A59 (44, 58), but in our study Y414A prevented the recovery of  
423 infectious progeny for MHV strain JHM, which exhibits less robust RNA synthesis and overall  
424 replication than MHV-A59. The results for the corresponding SARS-CoV (non-viable) and MERS-  
425 CoV (crippled) mutants were also variable, adding to the complexity of the overall picture.

426 A substantial set of N7-MTase mutations was monitored for 'side effects' at the level of *in*  
427 *vitro* ExoN activity (Fig. 4), although for SARS-CoV and MHV these would unlikely explain a lack  
428 of viability as ExoN knock-out mutants for both these viruses are only mildly crippled (42, 58, 73).  
429 Strikingly, for MERS-CoV, which does not tolerate ExoN inactivation (37), two of the N7-MTase  
430 mutations (G333A in motif III and H420A in motif VI) abolished detectable ExoN activity *in vitro*  
431 (Fig. 4B), but still allowed a certain level of virus replication (small-plaque phenotype), an  
432 observation that clearly warrants further investigation. In more general terms, the ExoN biochemical  
433 assay (Fig. 4) suggested that the functional separation between the two enzyme domains may be  
434 less strict than previously concluded, as also recently hypothesized following an *in silico* and  
435 biochemical analysis using SARS-CoV-2 nsp14 ExoN domain (72, 73). Alternatively, structural  
436 variation may explain the discrepancies observed. The impact of SARS-CoV N7-MTase motif-VI  
437 mutations on ExoN activity was major, highlighting the peculiar structural organization of nsp14, in  
438 which part of the N7-MTase substrate-binding cavity maps to the hinge that connects the N7-MTase  
439 and ExoN domains (Fig. 1). For other N7-MTase motifs probed, the functional separation from  
440 ExoN was confirmed, as also deduced from previous studies (27, 33, 35, 38).

441 In our reverse genetics studies with four betacoronaviruses, a consistent phenotype was  
442 observed only for N7-MTase mutants carrying replacements of the conserved R in motif II (non-

443 viable) and the conserved H and F in motif VI (crippled and non-viable, respectively). SARS-CoV  
444 residue R310 was previously reported to play a role in SAM binding (33), whereas F426 was  
445 proposed to entrench and stabilize the guanosine's purine moiety in the proximity of SAM (35). Our  
446 analysis (Fig. 2) redefined both residues as part of putative RNA binding site motifs II and VI,  
447 respectively, and they were found to be essential for *in vitro* N7-MTase activity in SARS-CoV. Our  
448 results highlight the importance of the nsp14 N7-MTase for CoV replication, but the variable impact  
449 of the replacement of several conserved residues suggests a substantial degree of conformational  
450 or functional flexibility in the enzyme's active site. Other factors, such as interactions of nsp14 with  
451 other replicase subunits, may also contribute to the observed phenotypic differences between  
452 equivalent N7-MTase mutants of different betacoronaviruses. Likewise, the translation of *in vitro*  
453 N7-MTase activity to virus viability is not straightforward and suggests complex structure-function  
454 relationships for the structurally unique CoV N7-MTase. Given both its essential role in CoV  
455 replication and its emerging status as a target for antiviral drug development efforts, it will be  
456 important to further expand the integrated biochemical and virological analysis to support the  
457 rational design of broad-spectrum inhibitors of the CoV N7-MTase.

458  
459

## 460 **Materials and Methods**

461

462 **Bioinformatics analysis.** Forty-seven CoV nsp14 sequences were retrieved (a complete list is  
463 provided in Table S1) and aligned using MAFFT . Delineation of motif I to VI was done manually  
464 using Seaview and WebLogo (74, 75). Structure analysis (PDB: 5NFY; (36)), volume estimation,  
465 cavity determination and sequence conservation was plotted onto the structure using UCSF  
466 Chimera (76). Electrostatic surface calculations were done using APBS (77). Predicting the  
467 structural impact of mutations was done using the PoPMuSiC server  
468 (<http://dezyme.com/en/software>) (78). This program introduces single-site mutations into a  
469 protein's structure and estimates the change in  $\Delta\Delta G_s$  values of such mutations. In the next step,  
470 all possible single-site mutations (4731 mutations) were sorted by their  $\Delta\Delta G_s$ , but only those in the  
471 conserved motifs in the vicinity of the catalytic pocket were used for further studies. PopMuSic  
472 predictions were cross-validated with SNAP2 to assess the impact of single amino acid  
473 substitutions on protein function (79).

474

475 **Recombinant protein expression and purification.** Recombinant SARS- and MERS-CoV nsp10  
476 and nsp14 were expressed in *E. coli* and purified as described previously (26), MERS-CoV-nsp14  
477 (37, 49) and MERS-nsp10 (29, 80). Vectors for mutant nsp14 expression were generated by  
478 QuikChange site-directed mutagenesis using Accuzyme DNA polymerase (Biolone) and verified by  
479 sequence analysis. For each recombinant protein used, two batches were produced and tested in  
480 enzymatic assays.

481

482 ***In vitro* nsp14 N7-MTase activity assay.** Reaction mixtures contained 50 or 200 nM of SARS-  
483 CoV or MERS-CoV recombinant nsp14, 7 nM GpppACCCC synthetic RNA substrate, 40 mM Tris-  
484 HCl (pH 8.0), 10 mM DTT, 5 mM MgCl<sub>2</sub>, 1.9  $\mu$ M SAM, 0.1  $\mu$ M 3H-SAM (Perkin Elmer). After a 30-  
485 min incubation at 30°C, the assay was stopped by addition of a 10-fold volume of ice-cold 100  $\mu$ M  
486 S-adenosyl-homocysteine (SAH; Thermo Fisher). Samples were spotted on DEAE filter mats  
487 (PerkinElmer) and washed twice with 10 mM ammonium formate (Sigma-Aldrich) (pH 8.0), twice  
488 with MilliQ water, and once with absolute ethanol (Sigma-Aldrich) (26), and MTase activity was  
489 quantified using a Wallac scintillation counter. To determine relative enzyme activities, the  
490 incorporation measurements for mutant proteins were normalized to values obtained with wild-type  
491 nsp14. Samples were measured in triplicate in each experiment.

492

493 ***In vitro* nsp14 ExoN assay.** Synthetic RNA substrate H4 (34) was radiolabeled at its 5' end using  
494 T4 polynucleotide kinase (Epicentre) and [ $\gamma$ -<sup>32</sup>P]ATP (Perkin Elmer) and used as substrate in ExoN  
495 activity assays. To this end, recombinant SARS-CoV or MERS-CoV nsp14 and nsp10 were mixed  
496 in a 1:4 concentration ratio of nsp14:nsp10 as indicated in Fig. 4. The proteins were added to 500  
497 nM radiolabeled substrate in reaction buffer (40 mM Tris-HCl (pH 7.5), 5 mM MgCl<sub>2</sub>, 1 mM DTT).

498 The protein mix was left for 10 min at room temperature to allow the formation of the complex.  
499 Assays were performed at 37°C and stopped by addition of a 3x volume of loading buffer containing  
500 96% formamide and 10 mM EDTA. Samples were analyzed on 7 M urea-containing 14% (wt/vol)  
501 polyacrylamide gels (acrylamide/bisacrylamide ratio, 19:1) buffered with 0.5xTris-taurine-EDTA  
502 and run at high voltage (1,600 V). Results were visualized by phosphorimaging using a Typhoon-  
503 9410 variable-mode scanner (GE Healthcare).

504

505 **Cell culture.** Baby hamster kidney cells (BHK-21; ATCC CCL10), Vero E6 (ATCC; CCL-81), HuH7  
506 cells and mouse 17 Cl1 cells were grown as described previously (19, 37, 81, 82). In order to  
507 amplify viral progeny and titrate recombinant CoVs by plaque assay, Vero E6 cells were used for  
508 SARS-CoV and SARS-CoV-2, HuH7 cells for MERS-CoV, and 17Cl1 cells for MHV. Cells were  
509 cultured in Eagle's minimal essential medium (EMEM; Lonza) with 8% fetal calf serum (FCS;  
510 Bodinco) supplemented with 100 IU/ml of penicillin and 100 µg/ml of streptomycin (Sigma) and 2  
511 mM L-Glutamine (PAA Laboratories). After infection, complete EMEM medium containing 2% FCS  
512 was used.

513

514 **Viruses and reverse genetics.** Mutations in the nsp14-coding region were engineered by two-  
515 step *en passant* recombineering in *E. coli* (83) using a bacterial artificial chromosome (BAC) vector  
516 with a full-length cDNA copy of a β-CoV genome. Virus isolates used were MERS-CoV strain  
517 EMC/2012 (84, 85)), SARS-CoV Frankfurt-1 (86), MHV-JHM-IA (87), and SARS-CoV-2  
518 BetaCoV/Wuhan/IVDC-HB-01/2019 (88). When designing mutations, additional translationally  
519 silent marker mutations was introduced near the site of mutagenesis, in order to analyze possible  
520 reversion and rule out potential contaminations with parental virus. For each mutant, two  
521 independent BAC clones were obtained, verified by sequencing of the full-length nsp14-coding  
522 region, and used for *in vitro* transcription (mMessage-mMachine T7 Kit; Ambion) and virus  
523 launching. Transfections with full-length RNA transcripts were performed as described before (37).  
524 Briefly, 5 µg RNA was electroporated into BHK-21 cells using an Amaxa nucleofactor 2b (program  
525 A-031) and Nucleofection T solution kit (Lonza). Transfected BHK-21 cells were mixed in a 1:1 ratio  
526 with cells susceptible to CoV infection: Vero E6 cells (for SARS-CoV and SARS-CoV-2), HuH7  
527 cells for MERS-CoV, or 17Cl1 cells (for MHV). Cell culture supernatants were collected when full  
528 cytopathic effect was observed, or at 6 days post transfection and progeny virus titers were  
529 determined by plaque assay (89). Viral replication was also monitored by immunofluorescence  
530 microscopy using antibodies recognizing double-stranded RNA (dsRNA;(90)) and non-structural or  
531 structural CoV proteins (37, 82, 91). To confirm the presence of the original mutations in viral  
532 progeny, supernatant from transfected cells was used to infect fresh cells, after which intracellular  
533 RNA was isolated with TriPure isolation reagent (Roche Applied Science). Next, the nsp14-coding  
534 region was amplified using standard RT-PCR methods and the purified amplicon was sequenced  
535 by Sanger sequencing. All work with live (recombinant) class-3 CoVs was done in a biosafety level  
536 3 laboratory at Leiden University Medical Center.

537

#### 538 **Data Availability**

539 All study data are included in the article and SI Appendix.

540

#### 541 **Acknowledgments**

542

543 N.S.O. was supported by the Marie Skłodowska-Curie ETN European Training Network  
544 'ANTIVIRALS' (EU Grant Agreement No. 642434). P.E.K. was the recipient of a scholarship from  
545 the Fondation "Méditerranée Infection". This work was supported by the Fondation pour la  
546 Recherche Médicale (Aide aux Équipes) and the SCORE project (EU Horizon 2020 research and  
547 innovation program, grant agreement 101003627). We thank LUMC colleagues Tessa Nelemans  
548 for excellent technical support and Alexander Gorbalenya for scientific discussions and critical  
549 reading of the manuscript.

550

551

#### 552 **References**

- 553 1. A. Ghosh, C. D. Lima, Enzymology of RNA cap synthesis. *Wiley Interdiscip Rev RNA* **1**, 152-  
554 172 (2010).
- 555 2. A. Ramanathan, G. B. Robb, S. H. Chan, mRNA capping: biological functions and  
556 applications. *Nucleic Acids Res* **44**, 7511-7526 (2016).
- 557 3. F. Ferron, E. Decroly, B. Selisko, B. Canard, The viral RNA capping machinery as a target  
558 for antiviral drugs. *Antiviral Res* **96**, 21-31 (2012).
- 559 4. A. J. Shatkin, Capping of eucaryotic mRNAs. *Cell* **9**, 645-653 (1976).
- 560 5. E. Kindler, V. Thiel, To sense or not to sense viral RNA--essentials of coronavirus innate  
561 immune evasion. *Curr Opin Microbiol* **20**, 69-75 (2014).
- 562 6. E. Decroly, F. Ferron, J. Lescar, B. Canard, Conventional and unconventional mechanisms  
563 for capping viral mRNA. *Nat Rev Microbiol* **10**, 51-65 (2011).
- 564 7. E. V. Koonin, B. Moss, Viruses know more than one way to don a cap. *Proc Natl Acad Sci*  
565 *U S A* **107**, 3283-3284 (2010).
- 566 8. P. Zhou *et al.*, A pneumonia outbreak associated with a new coronavirus of probable bat  
567 origin. *Nature* **579**, 270-273 (2020).
- 568 9. A. Gorbalenya *et al.*, The species Severe acute respiratory syndrome-related coronavirus:  
569 classifying 2019-nCoV and naming it SARS-CoV-2. *Nat Microbiol* **5**, 536-544 (2020).
- 570 10. L. van der Hoek, Human coronaviruses: what do they cause? *Antivir Ther* **12**, 651-658  
571 (2007).
- 572 11. Y. Wang, M. Grunewald, S. Perlman, Coronaviruses: An Updated Overview of Their  
573 Replication and Pathogenesis. *Methods Mol Biol* **2203**, 1-29 (2020).
- 574 12. X. Y. Ge *et al.*, Isolation and characterization of a bat SARS-like coronavirus that uses the  
575 ACE2 receptor. *Nature* **503**, 535-538 (2013).
- 576 13. V. D. Menachery *et al.*, A SARS-like cluster of circulating bat coronaviruses shows potential  
577 for human emergence. *Nat Med* **21**, 1508-1513 (2015).
- 578 14. B. Hu *et al.*, Discovery of a rich gene pool of bat SARS-related coronaviruses provides new  
579 insights into the origin of SARS coronavirus. *PLoS Pathog* **13**, e1006698 (2017).
- 580 15. J. Cui, F. Li, Z. L. Shi, Origin and evolution of pathogenic coronaviruses. *Nat Rev Microbiol*  
581 **17**, 181-192 (2019).
- 582 16. E. J. Snijder *et al.*, Unique and conserved features of genome and proteome of SARS-  
583 coronavirus, an early split-off from the coronavirus group 2 lineage. *J Mol Biol* **331**, 991-  
584 1004 (2003).
- 585 17. E. J. Snijder, E. Decroly, J. Ziebuhr, The Nonstructural Proteins Directing Coronavirus RNA  
586 Synthesis and Processing. *Adv Virus Res* **96**, 59-126 (2016).
- 587 18. K. Knoops *et al.*, SARS-coronavirus replication is supported by a reticulovesicular network  
588 of modified endoplasmic reticulum. *PLoS Biol* **6**, e226 (2008).
- 589 19. E. J. Snijder *et al.*, A unifying structural and functional model of the coronavirus replication  
590 organelle: Tracking down RNA synthesis. *PLoS Biol* **18**, e3000715 (2020).
- 591 20. S. Klein *et al.*, SARS-CoV-2 structure and replication characterized by in situ cryo-electron  
592 tomography. *Nat Commun* **11**, 5885 (2020).
- 593 21. A. Seybert, A. Hegyi, S. G. Siddell, J. Ziebuhr, The human coronavirus 229E superfamily 1  
594 helicase has RNA and DNA duplex-unwinding activities with 5'-to-3' polarity. *RNA* **6**, 1056-  
595 1068 (2000).
- 596 22. K. A. Ivanov, J. Ziebuhr, Human coronavirus 229E nonstructural protein 13:  
597 characterization of duplex-unwinding, nucleoside triphosphatase, and RNA 5'-  
598 triphosphatase activities. *J Virol* **78**, 7833-7838 (2004).



- 599 23. K. C. Lehmann *et al.*, Discovery of an essential nucleotidylating activity associated with a  
600 newly delineated conserved domain in the RNA polymerase-containing protein of all  
601 nidoviruses. *Nucleic Acids Res* **43**, 8416-8434 (2015).
- 602 24. L. Yan *et al.*, Cryo-EM Structure of an Extended SARS-CoV-2 Replication and Transcription  
603 Complex Reveals an Intermediate State in Cap Synthesis. *Cell* 10.1016/j.cell.2020.11.016  
604 (2020).
- 605 25. A. Shannon *et al.*, Protein-primed RNA synthesis in SARS-CoVs and structural basis for  
606 inhibition by AT-527. *bioRxiv* 10.1101/2021.03.23.436564, 2021.2003.2023.436564  
607 (2021).
- 608 26. M. Bouvet *et al.*, In vitro reconstitution of SARS-coronavirus mRNA cap methylation. *PLoS*  
609 *Pathog* **6**, e1000863 (2010).
- 610 27. Y. Chen *et al.*, Functional screen reveals SARS coronavirus nonstructural protein nsp14 as  
611 a novel cap N7 methyltransferase. *Proc Natl Acad Sci U S A* **106**, 3484-3489 (2009).
- 612 28. E. Decroly *et al.*, Coronavirus nonstructural protein 16 is a cap-0 binding enzyme  
613 possessing (nucleoside-2'O)-methyltransferase activity. *J Virol* **82**, 8071-8084 (2008).
- 614 29. Y. Chen *et al.*, Biochemical and structural insights into the mechanisms of SARS  
615 coronavirus RNA ribose 2'-O-methylation by nsp16/nsp10 protein complex. *PLoS Pathog*  
616 **7**, e1002294 (2011).
- 617 30. M. R. Denison, R. L. Graham, E. F. Donaldson, L. D. Eckerle, R. S. Baric, Coronaviruses: an  
618 RNA proofreading machine regulates replication fidelity and diversity. *RNA Biol* **8**, 270-  
619 279 (2011).
- 620 31. N. S. Ogando *et al.*, The curious case of the nidovirus exoribonuclease: its role in RNA  
621 synthesis and replication fidelity. *Front Microbiol* **10**, 1813 (2019).
- 622 32. X. Jin *et al.*, Characterization of the guanine-N7 methyltransferase activity of coronavirus  
623 nsp14 on nucleotide GTP. *Virus Res* **176**, 45-52 (2013).
- 624 33. Y. Chen *et al.*, Structure-function analysis of severe acute respiratory syndrome  
625 coronavirus RNA cap guanine-N7-methyltransferase. *J Virol* **87**, 6296-6305 (2013).
- 626 34. M. Bouvet *et al.*, RNA 3'-end mismatch excision by the severe acute respiratory syndrome  
627 coronavirus nonstructural protein nsp10/nsp14 exoribonuclease complex. *Proc Natl Acad*  
628 *Sci U S A* **109**, 9372-9377 (2012).
- 629 35. Y. Ma *et al.*, Structural basis and functional analysis of the SARS coronavirus nsp14-nsp10  
630 complex. *Proc Natl Acad Sci U S A* **112**, 9436-9441 (2015).
- 631 36. F. Ferron *et al.*, Structural and molecular basis of mismatch correction and ribavirin  
632 excision from coronavirus RNA. *Proc Natl Acad Sci U S A* **115**, E162-E171 (2018).
- 633 37. N. S. Ogando *et al.*, The enzymatic activity of the nsp14 exoribonuclease is critical for  
634 replication of MERS-CoV and SARS-CoV-2. *J Virol* 10.1128/JVI.01246-20 (2020).
- 635 38. M. Saramago *et al.*, New targets for drug design: importance of nsp14/nsp10 complex  
636 formation for the 3'-5' exoribonucleolytic activity on SARS-CoV-2. *FEBS J* **288**, 5130-5147  
637 (2021).
- 638 39. L. Xie, P. E. Bourne, Detecting evolutionary relationships across existing fold space, using  
639 sequence order-independent profile-profile alignments. *Proc Natl Acad Sci U S A* **105**,  
640 5441-5446 (2008).
- 641 40. R. Gana, S. Rao, H. Huang, C. Wu, S. Vasudevan, Structural and functional studies of S-  
642 adenosyl-L-methionine binding proteins: a ligand-centric approach. *BMC Struct Biol* **13**, 6  
643 (2013).

- 644 41. S. M. Sperry *et al.*, Single-amino-acid substitutions in open reading frame (ORF) 1b-nsp14  
645 and ORF 2a proteins of the coronavirus mouse hepatitis virus are attenuating in mice. *J Virol* **79**, 3391-3400 (2005).  
646
- 647 42. L. D. Eckerle, X. Lu, S. M. Sperry, L. Choi, M. R. Denison, High fidelity of murine hepatitis  
648 virus replication is decreased in nsp14 exoribonuclease mutants. *J Virol* **81**, 12135-12144  
649 (2007).
- 650 43. J. B. Case, A. W. Ashbrook, T. S. Dermody, M. R. Denison, Mutagenesis of S-adenosyl-  
651 methionine-binding residues in coronavirus nsp14 N7-methyltransferase demonstrates  
652 differing requirements for genome translation and resistance to innate immunity. *J Virol*  
653 **90**, 7248-7256 (2016).
- 654 44. Z. Zhang *et al.*, Live attenuated coronavirus vaccines deficient in N7-Methyltransferase  
655 activity induce both humoral and cellular immune responses in mice. *Emerg Microbes*  
656 *Infect* **10**, 1626-1637 (2021).
- 657 45. F. Ferron, H. J. Debat, A. Shannon, E. Decroly, B. Canard, A N7-guanine RNA cap  
658 methyltransferase signature-sequence as a genetic marker of large genome, non-  
659 mammalian Tobamiviridae. *NAR Genom Bioinform* **2**, lqz022 (2020).
- 660 46. P. T. Nga *et al.*, Discovery of the first insect nidovirus, a missing evolutionary link in the  
661 emergence of the largest RNA virus genomes. *PLoS Pathog* **7**, e1002215 (2011).
- 662 47. A. Saberi, A. A. Gulyaeva, J. L. Brubacher, P. A. Newmark, A. E. Gorbalenya, A planarian  
663 nidovirus expands the limits of RNA genome size. *PLoS Pathog* **14**, e1007314 (2018).
- 664 48. Y. Sun *et al.*, Yeast-based assays for the high-throughput screening of inhibitors of  
665 coronavirus RNA cap guanine-N7-methyltransferase. *Antiviral Res* **104**, 156-164 (2014).
- 666 49. W. Aouadi *et al.*, Toward the identification of viral cap-methyltransferase inhibitors by  
667 fluorescence screening assay. *Antiviral Res* **144**, 330-339 (2017).
- 668 50. R. Ahmed-Belkacem *et al.*, Synthesis of adenine dinucleosides SAM analogs as specific  
669 inhibitors of SARS-CoV nsp14 RNA cap guanine-N7-methyltransferase. *Eur J Med Chem*  
670 **201**, 112557 (2020).
- 671 51. R. He *et al.*, Potent and selective inhibition of SARS coronavirus replication by  
672 aurintricarboxylic acid. *Biochem Biophys Res Commun* **320**, 1199-1203 (2004).
- 673 52. M. H. Barnes, P. Spacciapoli, D. H. Li, N. C. Brown, The 3'-5' exonuclease site of DNA  
674 polymerase III from gram-positive bacteria: definition of a novel motif structure. *Gene*  
675 **165**, 45-50 (1995).
- 676 53. Y. Zuo, M. P. Deutscher, Exoribonuclease superfamilies: structural analysis and  
677 phylogenetic distribution. *Nucleic Acids Res* **29**, 1017-1026 (2001).
- 678 54. M. Byszewska, M. Smietanski, E. Purta, J. M. Bujnicki, RNA methyltransferases involved in  
679 5' cap biosynthesis. *RNA Biol* **11**, 1597-1607 (2014).
- 680 55. B. P. S. Chouhan, S. Maimaiti, M. Gade, P. Laurino, Rossmann-Fold Methyltransferases:  
681 Taking a "beta-Turn" around Their Cofactor, S-Adenosylmethionine. *Biochemistry* **58**, 166-  
682 170 (2019).
- 683 56. N. H. Moeller *et al.*, Structure and dynamics of SARS-CoV-2 proofreading exoribonuclease  
684 ExoN. *bioRxiv* 10.1101/2021.04.02.438274, 2021.2004.2002.438274 (2021).
- 685 57. R. A. Laskowski, SURFNET: a program for visualizing molecular surfaces, cavities, and  
686 intermolecular interactions. *J Mol Graph* **13**, 323-330, 307-328 (1995).
- 687 58. L. D. Eckerle, S. M. Brockway, S. M. Sperry, X. Lu, M. R. Denison, Effects of mutagenesis of  
688 murine hepatitis virus nsp1 and nsp14 on replication in culture. *Adv Exp Med Biol* **581**, 55-  
689 60 (2006).

- 690 59. K. E. Medvedev, L. N. Kinch, N. V. Grishin, Functional and evolutionary analysis of viral  
691 proteins containing a Rossmann-like fold. *Protein Sci* **27**, 1450-1463 (2018).
- 692 60. S. T. Rao, M. G. Rossmann, Comparison of super-secondary structures in proteins. *J Mol*  
693 *Biol* **76**, 241-256 (1973).
- 694 61. G. Sutton, J. M. Grimes, D. I. Stuart, P. Roy, Bluetongue virus VP4 is an RNA-capping  
695 assembly line. *Nat Struct Mol Biol* **14**, 449-451 (2007).
- 696 62. Y. Tao, D. L. Farsetta, M. L. Nibert, S. C. Harrison, RNA synthesis in a cage--structural  
697 studies of reovirus polymerase lambda3. *Cell* **111**, 733-745 (2002).
- 698 63. M. P. Egloff, D. Benarroch, B. Selisko, J. L. Romette, B. Canard, An RNA cap (nucleoside-2'-  
699 O-)-methyltransferase in the flavivirus RNA polymerase NS5: crystal structure and  
700 functional characterization. *EMBO J* **21**, 2757-2768 (2002).
- 701 64. M. M. Lai, S. A. Stohlman, Comparative analysis of RNA genomes of mouse hepatitis  
702 viruses. *J Virol* **38**, 661-670 (1981).
- 703 65. A. L. van Vliet, S. L. Smits, P. J. Rottier, R. J. de Groot, Discontinuous and non-discontinuous  
704 subgenomic RNA transcription in a nidovirus. *EMBO J* **21**, 6571-6580 (2002).
- 705 66. A. Seybert *et al.*, A complex zinc finger controls the enzymatic activities of nidovirus  
706 helicases. *J Virol* **79**, 696-704 (2005).
- 707 67. L. A. Pearson *et al.*, Development of a High-Throughput Screening Assay to Identify  
708 Inhibitors of the SARS-CoV-2 Guanine-N7-Methyltransferase Using RapidFire Mass  
709 Spectrometry. *SLAS Discov* 10.1177/24725552211000652, 24725552211000652 (2021).
- 710 68. K. Devkota *et al.*, Probing the SAM Binding Site of SARS-CoV-2 Nsp14 In Vitro Using SAM  
711 Competitive Inhibitors Guides Developing Selective Bisubstrate Inhibitors. *SLAS Discov* **26**,  
712 1200-1211 (2021).
- 713 69. S. Basu *et al.*, Identifying SARS-CoV-2 antiviral compounds by screening for small molecule  
714 inhibitors of Nsp14 RNA cap methyltransferase. *Biochem J* **478**, 2481-2497 (2021).
- 715 70. M. Bouvet *et al.*, Coronavirus Nsp10, a critical co-factor for activation of multiple  
716 replicative enzymes. *J Biol Chem* **289**, 25783-25796 (2014).
- 717 71. L. Yan *et al.*, Coupling of N7-methyltransferase and 3'-5' exoribonuclease with SARS-CoV-  
718 2 polymerase reveals mechanisms for capping and proofreading. *Cell* **184**, 3474-3485  
719 e3411 (2021).
- 720 72. C. Liu *et al.*, Structural basis of mismatch recognition by a SARS-CoV-2 proofreading  
721 enzyme. *Science* **373**, 1142-1146 (2021).
- 722 73. E. C. Smith, H. Blanc, M. C. Surdel, M. Vignuzzi, M. R. Denison, Coronaviruses lacking  
723 exoribonuclease activity are susceptible to lethal mutagenesis: evidence for proofreading  
724 and potential therapeutics. *PLoS Pathog* **9**, e1003565 (2013).
- 725 74. M. Gouy, S. Guindon, O. Gascuel, SeaView version 4: A multiplatform graphical user  
726 interface for sequence alignment and phylogenetic tree building. *Mol Biol Evol* **27**, 221-  
727 224 (2010).
- 728 75. G. E. Crooks, G. Hon, J. M. Chandonia, S. E. Brenner, WebLogo: a sequence logo generator.  
729 *Genome Res* **14**, 1188-1190 (2004).
- 730 76. E. F. Pettersen *et al.*, UCSF Chimera--a visualization system for exploratory research and  
731 analysis. *J Comput Chem* **25**, 1605-1612 (2004).
- 732 77. E. Jurrus *et al.*, Improvements to the APBS biomolecular solvation software suite. *Protein*  
733 *Sci* **27**, 112-128 (2018).
- 734 78. Y. Dehouck, J. M. Kwasigroch, D. Gilis, M. Rooman, PoPMuSiC 2.1: a web server for the  
735 estimation of protein stability changes upon mutation and sequence optimality. *BMC*  
736 *Bioinformatics* **12**, 151 (2011).

- 737 79. M. Hecht, Y. Bromberg, B. Rost, Better prediction of functional effects for sequence  
738 variants. *BMC Genomics* **16 Suppl 8**, S1 (2015).
- 739 80. Y. Wang *et al.*, Coronavirus nsp10/nsp16 methyltransferase can be targeted by nsp10-  
740 derived peptide in vitro and in vivo to reduce replication and pathogenesis. *J Virol* **89**,  
741 8416-8427 (2015).
- 742 81. D. D. Nedialkova, A. E. Gorbalenya, E. J. Snijder, Arterivirus Nsp1 modulates the  
743 accumulation of minus-strand templates to control the relative abundance of viral  
744 mRNAs. *PLoS Pathog* **6**, e1000772 (2010).
- 745 82. A. H. de Wilde *et al.*, MERS-coronavirus replication induces severe in vitro cytopathology  
746 and is strongly inhibited by cyclosporin A or interferon-alpha treatment. *J Gen Virol* **94**,  
747 1749-1760 (2013).
- 748 83. B. K. Tischer, G. A. Smith, N. Osterrieder, En passant mutagenesis: a two step markerless  
749 red recombination system. *Methods Mol Biol* **634**, 421-430 (2010).
- 750 84. F. Almazan *et al.*, Engineering a replication-competent, propagation-defective Middle  
751 East respiratory syndrome coronavirus as a vaccine candidate. *mBio* **4**, e00650-00613  
752 (2013).
- 753 85. H. H. Rabouw *et al.*, Middle East respiratory coronavirus accessory protein 4a inhibits PKR-  
754 mediated antiviral stress responses. *PLoS Pathog* **12**, e1005982 (2016).
- 755 86. S. Pfefferle *et al.*, Reverse genetic characterization of the natural genomic deletion in  
756 SARS-Coronavirus strain Frankfurt-1 open reading frame 7b reveals an attenuating  
757 function of the 7b protein in-vitro and in-vivo. *Virology* **6**, 131 (2009).
- 758 87. A. R. Fehr *et al.*, The nsp3 macrodomain promotes virulence in mice with coronavirus-  
759 induced encephalitis. *J Virol* **89**, 1523-1536 (2015).
- 760 88. T. T. N. Thao *et al.*, Rapid reconstruction of SARS-CoV-2 using a synthetic genomics  
761 platform. *Nature* 10.1038/s41586-020-2294-9 (2020).
- 762 89. S. H. van den Worm *et al.*, Reverse genetics of SARS-related coronavirus using vaccinia  
763 virus-based recombination. *PLoS One* **7**, e32857 (2012).
- 764 90. F. Weber, V. Wagner, S. B. Rasmussen, R. Hartmann, S. R. Paludan, Double-stranded RNA  
765 is produced by positive-strand RNA viruses and DNA viruses but not in detectable  
766 amounts by negative-strand RNA viruses. *J Virol* **80**, 5059-5064 (2006).
- 767 91. M. J. van Hemert *et al.*, SARS-coronavirus replication/transcription complexes are  
768 membrane-protected and need a host factor for activity in vitro. *PLoS Pathog* **4**, e1000054  
769 (2008).

770

771



772 **Figures and Tables**

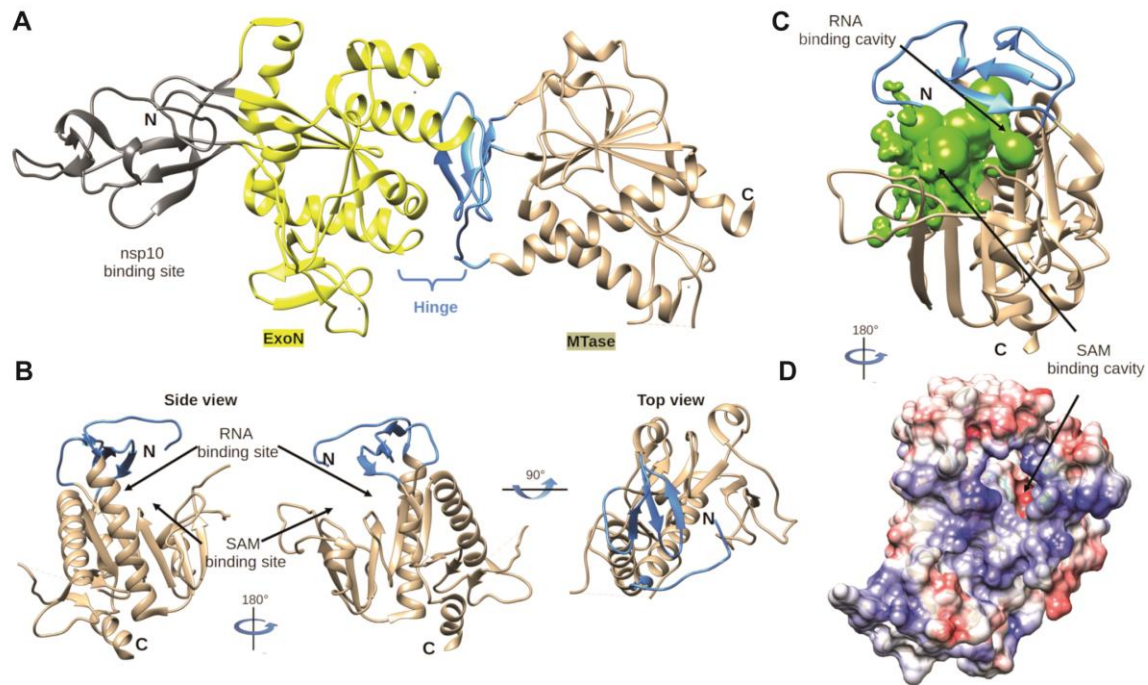

773

774 **Figure 1. Global architecture of coronavirus nsp14.** (A) Architecture of SARS-CoV nsp14 (PDB  
775 5NFY) showing the nsp10 binding site (grey), N-terminal ExoN domain (yellow), hinge subdomain  
776 (blue), and C-terminal N7-MTase domain (brown). (B) Side and top view of the hinge region and  
777 N7-MTase domain. The three strands of the hinge (blue) protrude from the N7-MTase domain  
778 (brown). (C) Analysis of the volume of the N7-MTase active site, with the cavity highlighted in green  
779 and hinge subdomain in blue. (D) Electrostatic surface representation of the CoV nsp14 hinge  
780 region and N7-MTase domain. Surface electrostatic potential calculated by Adaptive Poisson-  
781 Boltzmann Solver, from - 10 (red) to + 10 (blue) kT/e.  
782

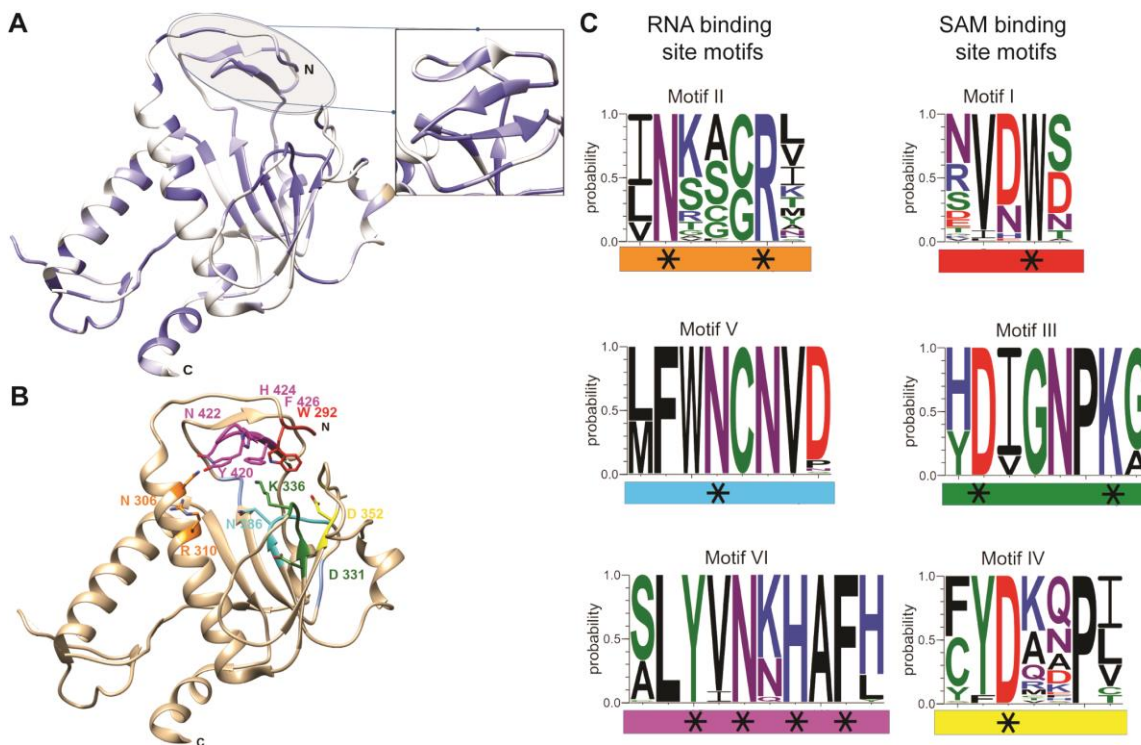

783

784

785 **Figure 2. Coronavirus-wide nsp14 N7-MTase conservation and structural analysis.** (A) CoV

786 nsp14 amino acid sequence conservation plotted on the structure (PDB 5NFY) of the SARS-CoV

787 hinge region and N7-MTase domain (dark blue to white shading representing 100% to less than

788 50% sequence identity). A list of sequences used for this comparison is presented in Table S1. (B)

789 Close-up of identified conserved motifs and residues in the N7-MTase catalytic pocket. (C)

790 WebLogo representation of 6 conserved motifs (I-VI) identified in the N7-MTase catalytic pocket.

791 Each motif is highlighted with a specific color (matching that in panel B) and categorized as a

792 proposed SAM- or RNA-binding motif. Black stars highlight charged or aromatic residues most

793 likely involved in ligand binding or catalytic activity.

794

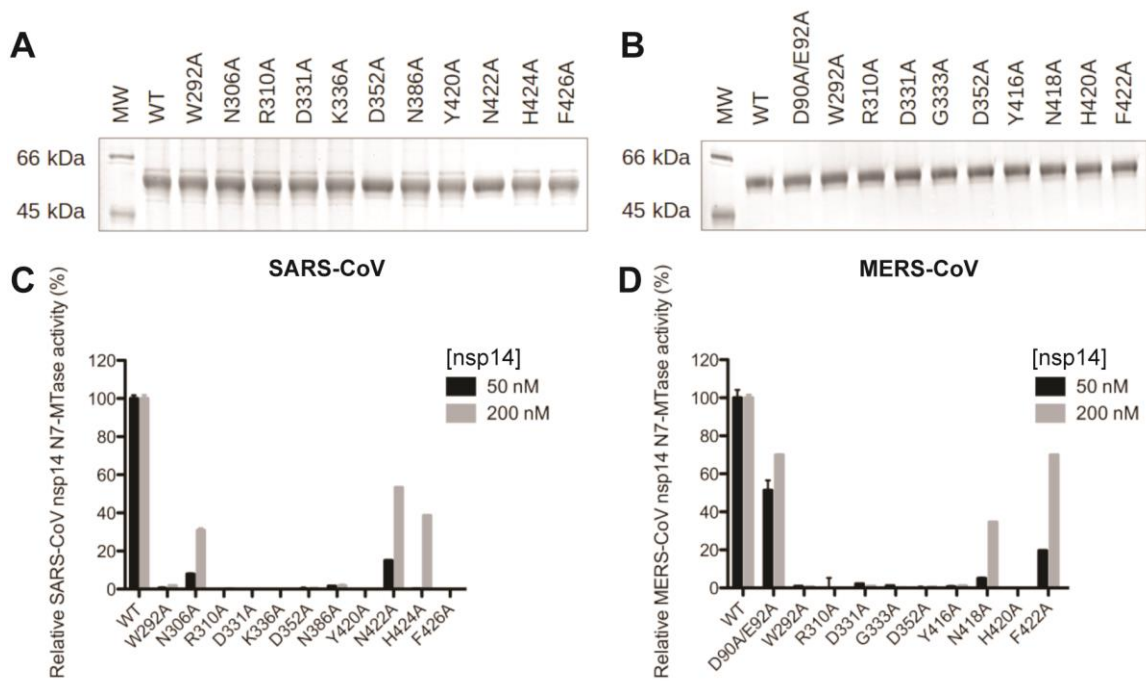

795  
796  
797  
798  
799  
800  
801  
802  
803  
804  
805  
806

**Figure 3. Expression and *in vitro* N7-MTase activity of SARS-CoV and MERS-CoV nsp14 mutants.** Recombinant SARS-CoV (A) and MERS-CoV (B) wild-type and mutant nsp14 proteins were expressed in *E. coli* and purified. Proteins were loaded (2  $\mu$ g and 1  $\mu$ g for SARS-CoV and MERS-CoV, respectively) and analyzed using 10% SDS-PAGE gels stained with Coomassie blue. The *in vitro* N7-MTase activity of SARS-CoV (C) and MERS-CoV (D) nsp14 mutants was determined using an assay with a GpppACCCC synthetic RNA substrate and radiolabeled SAM as methyl donor. Nsp14 concentrations of 50 and 200 nM were used, as indicated. N7-MTase activities were compared to those of the respective wild-type nsp14 controls. For MERS-CoV, ExoN knockout mutant D90A/E92A was included as a control.

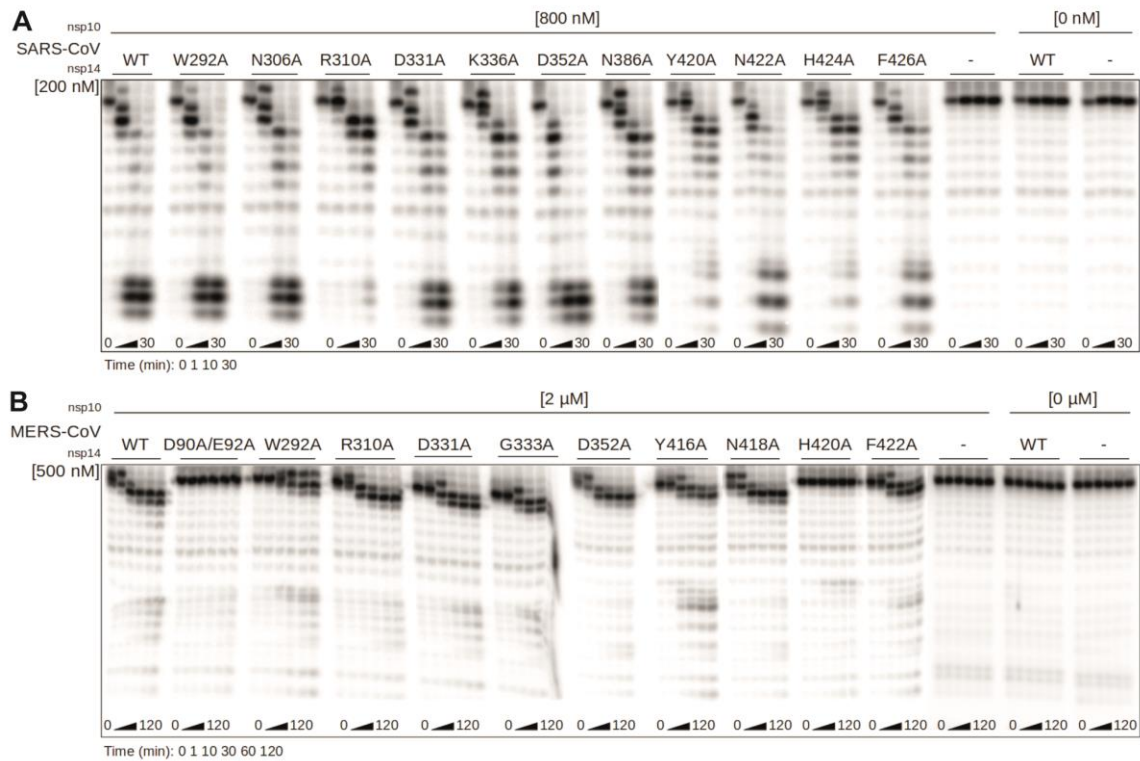

807  
808  
809  
810  
811  
812  
813  
814  
815  
816

**Figure 4. *In vitro* exoribonuclease activity of SARS-CoV and MERS-CoV N7-MTase mutants.**

The *in vitro* ExoN activity of SARS-CoV (A) and MERS-CoV (B) mutant nsp14 proteins (Fig. 3) was determined by monitoring the degradation of a 5' radiolabeled RNA substrate (see Methods). An nsp14 concentration of 200 or 500 nM was used (as indicated) and a fourfold molar excess of the corresponding nsp10 was added. A time course assay was performed using time points 0, 1, 10, and 30 min for SARS-CoV, and 0, 1, 10, 30, 60, and 120 min for MERS-CoV nsp14. Reaction products were analyzed by denaturing gel electrophoresis and autoradiography.



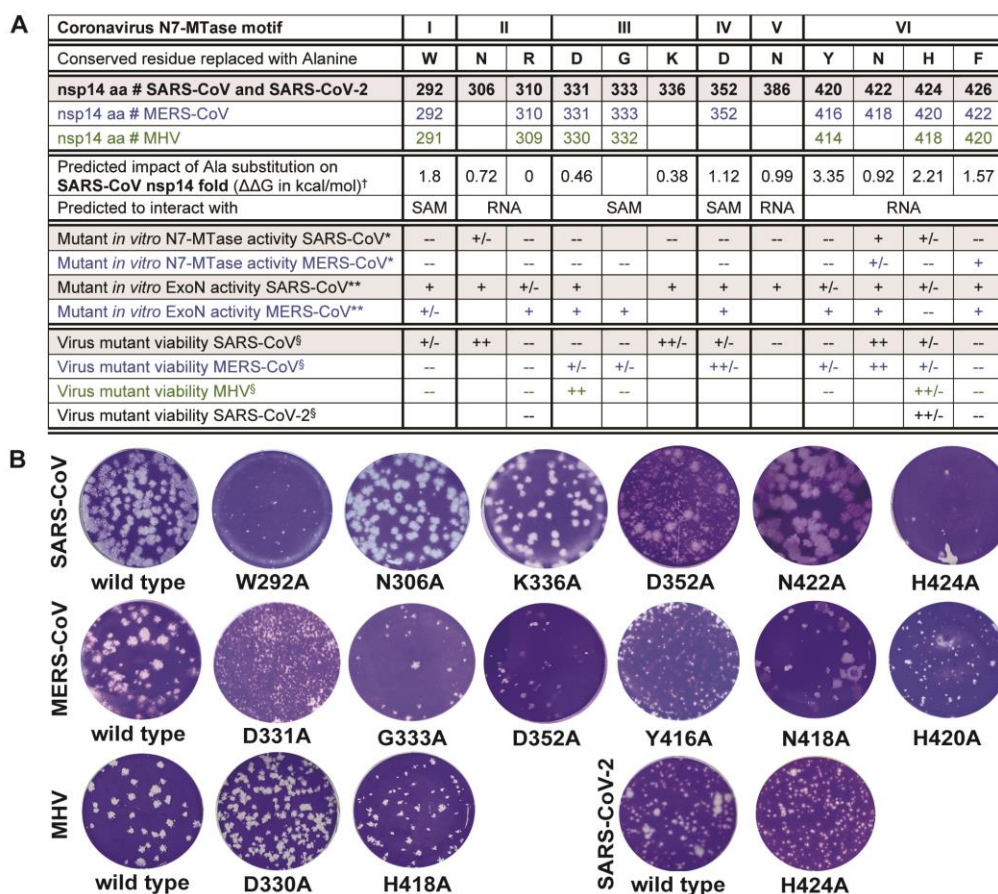

817

818

819 **Figure 5. Virological characterization of betacoronavirus N7-MTase mutants.** (A) Summary of

820 results obtained from *in silico*, biochemical and virological studies of CoV mutants. <sup>†</sup> Values

821 presented correspond to  $\Delta\Delta G$  values from Table S2. \* N7-MTase activity of each mutant was

822 compared to the wild-type control enzyme and scored +, +/-, or -- when >50%, between 10 and

823 50%, or <10%, respectively. Values used here correspond to results obtained using the high

824 enzyme concentration (Fig. 3B and 3D). \*\* ExoN activity of each mutant was evaluated relative to

825 the wild-type control enzyme and scored +, +/-, or -- for equal, reduced, and abolished ExoN

826 activity, respectively. <sup>§</sup> Mutant virus phenotypes, as deduced from plaque assays, were scored as:

827 --, non-viable; +/-, severely crippled; ++/-, mildly crippled; ++, similar to the wild-type control. Empty

828 cells indicate mutants that were not generated. (B) Plaque phenotype of the progeny of viable N7-

829 MTase mutants. Plaque assays were performed using supernatants harvested from transfected

830 cells at 3 (MERS-CoV in HuH7 cells, SARS-CoV and SARS-CoV-2 in Vero E6 cells) or 4 days

(MHV in 17C11) post transfection.
